# Supplementary material for: Geographical variation in rates of surgical treatment for female stress urinary incontinence in England: a national cohort study
Source: PubMed Central journal article supplement (PMC6720135; doi:10.1136/bmjopen-2019-029878), 2019-08-28
Supplement: bmjopen-2019-029878.draft_revisions.pdf [file bmjopen-2019-029878.draft_revisions.pdf]

# BMJ Open

BMJ Open is committed to open peer review. As part of this commitment we make the peer review history of every article we publish publicly available.

When an article is published we post the peer reviewers' comments and the authors' responses online. We also post the versions of the paper that were used during peer review. These are the versions that the peer review comments apply to.

The versions of the paper that follow are the versions that were submitted during the peer review process. They are not the versions of record or the final published versions. They should not be cited or distributed as the published version of this manuscript.

BMJ Open is an open access journal and the full, final, typeset and author-corrected version of record of the manuscript is available on our site with no access controls, subscription charges or pay-per-view fees (<http://bmjopen.bmj.com>).

If you have any questions on BMJ Open's open peer review process please email [info.bmjopen@bmj.com](mailto:info.bmjopen@bmj.com)

# BMJ Open

## GEOGRAPHICAL VARIATION IN RATES OF SURGICAL TREATMENT FOR FEMALE STRESS URINARY INCONTINENCE IN ENGLAND: A NATIONAL COHORT STUDY

|                               |                                                                                                                                                                                                                                                                                                                                                                                                                                                                                                                                                                                                                                                                                                                                                                                                                                                                                                                                                                                                                                                                                                                                                                   |
|-------------------------------|-------------------------------------------------------------------------------------------------------------------------------------------------------------------------------------------------------------------------------------------------------------------------------------------------------------------------------------------------------------------------------------------------------------------------------------------------------------------------------------------------------------------------------------------------------------------------------------------------------------------------------------------------------------------------------------------------------------------------------------------------------------------------------------------------------------------------------------------------------------------------------------------------------------------------------------------------------------------------------------------------------------------------------------------------------------------------------------------------------------------------------------------------------------------|
| Journal:                      | <i>BMJ Open</i>                                                                                                                                                                                                                                                                                                                                                                                                                                                                                                                                                                                                                                                                                                                                                                                                                                                                                                                                                                                                                                                                                                                                                   |
| Manuscript ID                 | bmjopen-2019-029878                                                                                                                                                                                                                                                                                                                                                                                                                                                                                                                                                                                                                                                                                                                                                                                                                                                                                                                                                                                                                                                                                                                                               |
| Article Type:                 | Research                                                                                                                                                                                                                                                                                                                                                                                                                                                                                                                                                                                                                                                                                                                                                                                                                                                                                                                                                                                                                                                                                                                                                          |
| Date Submitted by the Author: | 18-Feb-2019                                                                                                                                                                                                                                                                                                                                                                                                                                                                                                                                                                                                                                                                                                                                                                                                                                                                                                                                                                                                                                                                                                                                                       |
| Complete List of Authors:     | <p>Mamza, Jil; London School of Hygiene and Tropical Medicine Faculty of Public Health and Policy, Department of Health Services Research and Policy</p> <p>Geary, Rebecca; London School of Hygiene and Tropical Medicine Faculty of Public Health and Policy, Department of Health Services Research and Policy; University College London, Department of Infection and Population Health</p> <p>El-Hamamsy, Dina; University Hospitals of Leicester NHS Trust, Obstetrics and Gynaecology Department</p> <p>Cromwell, David; London School of Hygiene and Tropical Medicine</p> <p>Duckett, Jonathan; Medway NHS Foundation Trust</p> <p>Monga, Ash ; University of Southampton</p> <p>Toozs-Hobson, Philip; Birmingham Women's and Children's NHS Foundation Trust</p> <p>Mahmood, Tahir; Forth Park Hospital, Obstetrics and Gynaecology</p> <p>Wilson, Andrew; University of Leicester, Health Sciences</p> <p>Tincello , Doug ; University of Leicester</p> <p>van der Meulen, Jan; London School of Hygiene and Tropical Medicine</p> <p>Gurol Urganci, Ipek; London School of Hygiene &amp; Tropical Medicine, Health Services Research &amp; Policy</p> |
| Keywords:                     | Urogynaecology < GYNAECOLOGY, Geographical mapping < TROPICAL MEDICINE, Minimally invasive surgery < GYNAECOLOGY                                                                                                                                                                                                                                                                                                                                                                                                                                                                                                                                                                                                                                                                                                                                                                                                                                                                                                                                                                                                                                                  |
|                               |                                                                                                                                                                                                                                                                                                                                                                                                                                                                                                                                                                                                                                                                                                                                                                                                                                                                                                                                                                                                                                                                                                                                                                   |

SCHOLARONE™  
Manuscripts

1  
2  
3  
4 **GEOGRAPHICAL VARIATION IN RATES OF SURGICAL TREATMENT FOR FEMALE STRESS**  
5 **URINARY INCONTINENCE IN ENGLAND: A NATIONAL COHORT STUDY**  
6  
7

8 Jil B Mamza<sup>1\*</sup>, Rebecca S Geary<sup>1\*</sup>, Dina El-Hamamsy<sup>2</sup>, David Cromwell<sup>1</sup>, Jonathan Duckett<sup>3</sup>,  
9 Ash Monga<sup>4</sup>, Philip Tooze-Hobson<sup>5</sup>, Tahir Mahmood<sup>6</sup>, Andrew Wilson<sup>7</sup>, Douglas G Tincello<sup>7</sup>,  
10 Jan van der Meulen<sup>1#</sup>, Ipek Gurol-Urganci<sup>1#</sup>  
11  
12  
13  
14  
15

16 <sup>1</sup> Department of Health Services Research and Policy, London School of Hygiene & Tropical Medicine

17 <sup>2</sup> Obstetrics and Gynaecology Department, University Hospitals of Leicester

18 <sup>3</sup> Medway NHS Foundation Trust

19 <sup>4</sup> University Hospital Southampton NHS Foundation Trust

20 <sup>5</sup> Birmingham Women's NHS Foundation Trust

21 <sup>6</sup> NHS Fife, Victoria Hospital

22 <sup>7</sup> Department of Health Sciences, University of Leicester  
23  
24  
25  
26  
27  
28  
29  
30  
31  
32

33 *\* Joint first authors have made an equal contribution to this study and manuscript*

34 *# Joint senior authors have made an equal contribution to this study and manuscript*  
35  
36  
37  
38  
39

40 **Corresponding Author**

41 Ipek Gurol-Urganci

42 Department of Health Services Research and Policy

43 London School of Hygiene & Tropical Medicine

44 15-17 Tavistock Place, London WC1H 9SH, United Kingdom

45 Telephone: +44 (0)20 7927 2266

46 Email: [ipek.gurol@lshtm.ac.uk](mailto:ipek.gurol@lshtm.ac.uk)  
47  
48  
49  
50  
51

52 **Word count:** 2257 words

53 **Running title:** Variation in surgery for female stress urinary incontinence  
54  
55  
56  
57  
58  
59  
60

## ABSTRACT

**Objective** To examine geographic variation in use of surgery for female stress urinary incontinence (SUI), mainly mid-urethral mesh tape insertions, in the English National Health Service (NHS).

**Design** National cohort study

**Setting** NHS hospitals

**Participants** 27,997 women aged 20 years or older who had a first stress urinary incontinence surgery in an English NHS Hospital between April 2013 and March 2016 and a diagnosis of stress urinary incontinence at the same time as the procedure

**Methods** Multilevel Poisson regression was used to adjust for geographic differences in age, ethnicity, prevalence of long-term illness and socio-economic deprivation.

**Primary outcome measure** Rate of surgery for stress urinary incontinence per 100,000 women/year at two geographic levels: Clinical Commissioning Group (CCG, n=209) and Sustainability and Transformation Partnership (STP, n=44).

**Results** The rate of surgery for stress urinary incontinence was 40 procedures per 100,000 women/year. Risk-adjusted rates ranged from 20 to 106 procedures per 100,000 women/year across CCGs and 24 to 69 procedures per 100,000 women/year across the STP areas. These regional differences were only partially explained by demographic characteristics as adjustment reduced variance of surgery rates by 16% among the CCGs and 35% among the STPs.

**Conclusions** Substantial geographic variation exists in use of surgery for female stress urinary incontinence in the English NHS, suggesting that women in some areas are more likely to be treated compared to women with the same condition in other areas. The variation reflects differences in how national guidelines are being interpreted, in the context of the ongoing debate about the safety of SUI surgery.

**Funding** National Institute for Health Research (NIHR) Health Services and Delivery Research (HS&DR) Programme (14/70/162)

**Keywords:** Stress urinary incontinence, mid-urethral mesh tape, geographical variation.

## Article Summary

### Strengths and limitations of this study

- The data used for the study includes all surgical procedures performed within English NHS Hospitals, reducing the risk of selection bias
- Statistical modelling, utilising multi-level empirical Bayes methods was used to minimise potential estimation error problems when identifying potential outlier areas
- Unmeasured confounding factors and differences in coding practices may have contributed to variation in surgery rates
- This study did not account for surgical procedures performed in private hospitals. However, it is likely that at least 90% of all continence procedures in England are provided by the NHS, as the total annual spend on private health care in England is approximately 5% of the total annual spend on the NHS.

## INTRODUCTION

Stress urinary incontinence (SUI), estimated to affect 15 to 20% of women in the UK(1), has a significant impact on women's quality of life,(2) affecting physical and social activities and confidence(3). Surgical treatments are recommended when conservative treatments are ineffective or not tolerated(4).

Mid-urethral mesh tapes were introduced in 1998 as a novel surgical treatment for female SUI(5). A sharp rise in the use of mesh tapes to treat SUI followed, due in part to the minimally invasive nature of the procedure, with a high of 11,365 procedures conducted in 2009. Over the same period, the previous standard treatment for female SUI, colposuspension (a major abdominal surgery) declined from more than 3,500 procedures per year to just 200(6). However, after the peak of more than 11,000 procedures in 2008-09, the number of mesh procedures for SUI has almost halved, falling to just 6227 by 2016-17(7, 8). The decline in the use of mesh tapes for SUI has most likely been in response to concerns about the safety of mesh(9-11) with some women experiencing pain, dyspareunia, persistent urinary incontinence, and exposure or erosion(12, 13). In 2018, the use of mesh tapes to treat SUI was suspended in the NHS in England, following an interim recommendation of the Independent Medicines and Medical Devices Safety Review(14, 15).

Previous studies highlighted that not all women with SUI have equitable access to appropriate incontinence care; access to continence surgery varies by age(16, 17) and ethnic and socio-economic backgrounds;(18) with evidence of variations in care for other vulnerable populations. In light of the current suspension of the use of mid-urethral mesh tapes, the most commonly used procedures to treat female SUI, evidence is needed regarding the utilisation, safety and effectiveness of mesh, and non-mesh, surgical continence procedures. Given the concerns about differences in access to surgical treatment for SUI, we assessed geographic variation in the rates of surgical treatment for female SUI in the English National Health Service (NHS) between 2013 and 2016 across two geographic levels, defined according to structures for commissioning services and coordinating service improvement.

## METHODS

### Study design, setting and definitions

This study used data from Hospital Episode Statistics (HES), a routinely collected, administrative dataset which contains records of all NHS hospital admissions in England. The cohort comprised women aged 20 years and older who had received surgical treatment for SUI between 1 April 2013 and 31 March 2016 and had an SUI diagnosis recorded at the time of the procedure. SUI surgery was defined using UK Office for Population Censuses and Surveys Classification (OPCS-4) codes (Table 1)(19). SUI diagnosis was defined using the International Classification of Diseases, ICD-10 code: N39.3 Stress urinary incontinence(20). Women may have had repeat procedures in the study period, however, only the first operation was counted in calculating the rate of surgery.

### Measures

The outcome measure was rate of surgery for SUI per 100,000 women/year at two geographic levels: 209 Clinical Commissioning Group (CCG) and 44 Sustainability and Transformation Partnership (STP) areas. CCGs are statutory NHS bodies responsible for the planning and commissioning of health care services in a local area (average population size of about 104,000 adult females). CCG areas are grouped into 44 STP areas (average population size of about 493,000 adult females), which were set up to coordinate improvements in the delivery of NHS services(21). Reference denominator populations were derived by aggregating the 2011 Census population counts for women aged 20 and older in lower super output areas (LSOA) that are within the respective boundaries of the CCG and STP areas. There are 32,844 LSOAs (postcode-based geographic units) in England (average population approximately 1,700 people)(22).

Sociodemographic factors may explain variations in rates of surgery for SUI. We handled age as a patient-level characteristic grouped into five categories (20-39, 40-49, 50-59, 60-69 and 70+ years). Socio-economic status, ethnicity and limiting long-term illness were CCG-level

1  
2  
3 characteristics derived from 2011 Census data. For socio-economic status, we used the  
4 averages of the national ranking of the Index of Multiple Deprivation (IMD) (23) of LSOAs  
5 within each CCG, and grouped the CCG averages into national quintiles ranging from 1 (most  
6 deprived CCGs) to 5 (least deprived CCGs). For ethnicity, we used the percentage of the  
7 population reporting black or ethnic minority (BME) background, and for long-term illness  
8 the percentage who reported that their day-to-day activities were limited because of a  
9 health problem or disability which has lasted, or is expected to last, at least 12 months. For  
10 each CCG, we took the averages of these percentages for LSOAs and grouped these CCG  
11 averages into national quintiles ranging from 1 (CCGs with average percentages in the  
12 lowest quintile) to 5 (highest quintile).  
13  
14  
15  
16  
17  
18  
19  
20  
21  
22  
23

### 24 **Statistical analyses**

25  
26 We calculated the number and the unadjusted and adjusted rates per 100,000 women/year  
27 of SUI procedures overall, and according to patient and regional characteristics. Incidence  
28 rate ratios were used to represent associations between the procedure rate and regional  
29 characteristics. Multilevel Poisson regression models were used to produce empirical Bayes  
30 estimates of the unadjusted and adjusted incidence rates for each CCG and STP area. In  
31 addition, risk adjusted regression models were used to assess geographic variation in rates  
32 of surgery by year. The empirical Bayes estimator produces more precise results by “pulling”  
33 the estimates for small outlier regions towards the overall mean(24). For each area level  
34 (CCG/STP), we illustrated the amount of variation in adjusted surgery rates using maps and  
35 range plots with 99.8% credibility intervals. CCGs and STPs were marked as “outliers” where  
36 the national average rate of surgery was not within the 99.8% credibility interval of their  
37 rates. All statistical calculations were performed using Stata 14.  
38  
39  
40  
41  
42  
43  
44  
45  
46  
47  
48  
49  
50

### 51 **Patient involvement**

52  
53 This study was supported by a steering group which included lay members and patient  
54 representatives who provided input to the design of the study and interpretation of the  
55 results and contributed to the dissemination plan. The steering group met on a regular  
56 basis for the duration of the study.  
57  
58  
59  
60



## RESULTS

### Description of the cohort

Between April 2013 and March 2016, there were 33,708 inpatient episodes with a surgical procedure for SUI. 4,996 of these episodes did not satisfy the inclusion criteria, for example, because they did not have an SUI diagnosis recorded at the time of the procedure, outlined in Figure 1, and 715 recorded a subsequent operation in the study period (Figure 1). 27,997 procedures were included in the analyses, 90% of which were mid-urethral mesh tape insertions (Table 1). Restricting our analyses to these 27,997 first SUI procedures captured >97% of all 28,789 SUI procedures in the study period, and the distribution of procedure types did not vary between all and first procedures (Table 1). The national annual rate of surgery was 40 procedures per 100,000 women.

**Table 1: OPCS-4 codes and counts of SUI procedures with relevant diagnosis (ICD-10) code N39.3**

| OPSC-4 | Description                                                                                   | All operations*<br>N (%) | First operations**<br>N (%) |
|--------|-----------------------------------------------------------------------------------------------|--------------------------|-----------------------------|
|        | <b><u>Mid-urethral tape insertions</u></b>                                                    |                          |                             |
| M53.3  | Introduction of tension-free vaginal tape                                                     | 16665 (57.9)             | 16415 (58.6)                |
| M53.6  | Introduction of transobturator tape                                                           | 8866 (30.8)              | 8722 (31.2)                 |
|        | <b><u>Injection of urethral bulking agents</u></b>                                            |                          |                             |
| M56.3  | Endoscopic injection of inert substance into outlet of female bladder                         | 1628 (5.7)               | 1435 (5.1)                  |
|        | <b><u>Other abdominal / vaginal operations</u></b>                                            |                          |                             |
| M51.1  | Abdominoperineal suspension of urethra                                                        | 32 (0.1)                 | 29 (0.1)                    |
| M51.2  | Endoscopic suspension of neck of bladder                                                      | 6 (<0.1)                 | 6 (<0.1)                    |
| M51.8  | Other specified combined abdominal and vaginal operations to support outlet of female bladder | 15 (0.1)                 | 13 (<0.1)                   |
| M51.9  | Unspecified combined abdominal and vaginal operations to support outlet of female bladder     | 2 (<0.1)                 | 2 (<0.1)                    |
| M52.1  | Suprapubic sling operation                                                                    | 355 (1.2)                | 328 (1.2)                   |
| M52.2  | Retropubic suspension of neck of bladder                                                      | 78 (0.3)                 | 76 (0.3)                    |
| M52.3  | Colposuspension of neck of bladder                                                            | 587 (2.0)                | 533 (1.9)                   |
| M52.8  | Other specified abdominal operations to support outlet of female bladder                      | 20 (0.1)                 | 15 (0.1)                    |
| M52.9  | Unspecified abdominal operations to support outlet of female bladder                          | 3 (<0.1)                 | 2 (<0.1)                    |
| M53.1  | Vaginal buttressing of urethra                                                                | 130 (0.5)                | 126 (0.5)                   |
| M53.8  | Other specified vaginal operations to support outlet of female bladder                        | 302 (1.0)                | 216 (0.8)                   |
| M53.9  | Unspecified vaginal operations to support outlet of female bladder                            | 5 (<0.1)                 | 4 (<0.1)                    |
| M55.2  | Implantation of artificial urinary sphincter into outlet of female bladder                    | 18 (0.1)                 | 11 (<0.1)                   |
| M55.6  | Insertion of retropubic device for female stress urinary incontinence NEC                     | 56 (0.2)                 | 52 (0.2)                    |
| M55.8  | Other specified other open operations on outlet of female bladder                             | 14 (<0.1)                | 8 (<0.1)                    |
| M55.9  | Unspecified other open operations on outlet of female bladder                                 | 0 (0)                    | 0 (0)                       |
| M58.8  | Other specified other operations on outlet of female bladder                                  | 7 (<0.1)                 | 4 (<0.1)                    |
| M58.9  | Unspecified other operations on outlet of female bladder                                      | 0 (0)                    | 0 (0)                       |
|        | <b>Total</b>                                                                                  | <b>28789</b>             | <b>27997</b>                |

Abbreviations: SUI (stress urinary incontinence); ICD-10 (International Classification of Diseases, version 10); OPCS (Office for Population Censuses and Surveys Classification); N39.3 (Stress urinary incontinence ICD-10 code). \*For 77 episodes of care out of 28712 eligible episodes, two procedures were recorded and both are included in the overall count. \*\* For episodes of care where two procedures were recorded, only the more invasive or specified procedure is counted as first operation.

### Geographic variations in surgery

Figures 2a and 3a show the variation in the unadjusted empirical Bayes estimates of the procedure rates for SUI across the CCGs and STPs, with figures 2b and 3b illustrating the rates adjusted for patients' age and the CCG-level characteristics: socio-economic status, percentage of the population reporting BME background, and percentage with a long-term illness.

The adjusted SUI procedure rates for CCGs ranged from 20 to 106 procedures compared with unadjusted rates of 11 to 120 procedures per 100,000 women/year (Figure 2). Ninety-nine CCGs (47%) were marked as "outliers" (where the national average was not within the 99.8% credibility interval of their rate). These comprised 43 CCGs (20.6%) with rates below the national average and 56 CCGs (26.8%) with rates above the national average. Risk adjustment reduced the number of CCGs marked as "outliers" from 99 (47.4%) to 75 (36%). The standard deviation (SD) of the CCG-level variation in adjusted rates (SD 0.27, 95%CI: 0.24-0.30) was 16% lower than the SD of the unadjusted rates (SD 0.32, 95%CI: 0.29-0.36).

The adjusted SUI procedure rates for STPs ranged from 24 to 69 procedures compared with unadjusted rates of 20 to 77 per 100 000 women/year (Figure 3). Risk adjustment reduced the number of STPs identified as outliers from 23 (52%) to 22 (50%). The amount of variation observed declined by 35% after risk adjustment: the SD of the STP-level variation for unadjusted and adjusted model were 0.23 (95%CI: 0.17-0.31) and 0.15 (95%CI: 0.11-0.22) respectively.

Annual SUI procedure rates declined over the study period from 52 per 100,000 women in 2013 to 36 per 100,000 women in 2015. However, there was no evidence that CCG- or STP-level variation changed over time. In separate (adjusted) regression models run by year, the SD of CCG-level variation was 0.26 (95%CI: 0.23-0.30) in 2013; 0.27 (95%CI: 0.23-0.31) in 2014 and 0.29 (95%CI: 0.25-0.34) in 2015. The SD of STP-level variation (adjusted model) was 0.13 (95%CI: 0.08-0.20) in 2013, 0.17 (95%CI: 0.11-0.25) in 2014 and 0.18 (95%CI: 0.12-0.26) in 2015.

### Association of patient and regional characteristics with surgery rates

Table 2 shows the rates of surgery by regional characteristics. Rates were lowest for the 20-39 year age group (16 per 100,000 women/year), and highest for 40-49 year age group (84 per 100,000 women/year), declining with age beyond 50 years. Compared to the rate among women aged 40-49 years, the surgery rate for women aged 50-59 years was 20% lower (IRR 0.80, 95% CI 0.78-0.83), for women aged 60 to 69 years was 46% lower (IRR 0.54, 95% CI 0.52-0.56), and for women aged 70+ years was 69% lower (IRR 0.31, 95% CI 0.30-0.33).

Rates of surgery were lower for areas with higher proportions of BME populations (highest vs lowest quintile IRR 0.63, 95% CI 0.49-0.81). There were no differences in surgery rates according to the proportion of people with long-term limiting illness or socioeconomic deprivation at the CCG-level.

**Table 2: Regional characteristics and their association with SUI procedure rates**

| Regional factor                                   | Scale of factor (1 unit)  | Procedures, n (%)                     | Crude rate per 100,000 women/year     | Procedure rate ratio (95%CI) | P value* |
|---------------------------------------------------|---------------------------|---------------------------------------|---------------------------------------|------------------------------|----------|
| <b>Age categories</b>                             |                           |                                       |                                       |                              |          |
| 20-39                                             | Age group in years        | 3253 (11.6)                           | 15.9                                  | 0.18 (0.17-0.19)             | <0.001   |
| 40-49                                             |                           | 9761 (34.9)                           | 84.4                                  | Reference                    |          |
| 50-59                                             |                           | 7496 (26.8)                           | 67.5                                  | 0.80 (0.78-0.83)             |          |
| 60-69                                             |                           | 4352 (15.5)                           | 46.2                                  | 0.54 (0.52-0.56)             |          |
| ≥70                                               |                           | 3135 (11.2)                           | 26.8                                  | 0.31 (0.30-0.33)             |          |
| <b>Socio-economic status</b>                      |                           |                                       |                                       |                              |          |
| Most deprived                                     | Quintile category of      | 5838 (20.9)                           | 43.0                                  | Reference                    | 0.84     |
| More deprived                                     | IMD ranking               | 6315 (22.6)                           | 47.5                                  | 1.08 (0.93-1.25)             |          |
| Average                                           |                           | 6371 (22.8)                           | 47.9                                  | 1.05 (0.89-1.25)             |          |
| Less deprived                                     |                           | 5001 (17.9)                           | 39.9                                  | 1.02 (0.85-1.21)             |          |
| Least deprived                                    |                           | 4472 (15.1)                           | 36.3                                  | 1.05 (0.85-1.29)             |          |
| <b>Black and minority ethnic (BME) population</b> |                           |                                       |                                       |                              |          |
| 1: CCGs with lowest proportion                    | Ranked category of        | 5579 (19.9)                           | 48.8                                  | Reference                    | 0.001    |
| 2                                                 | proportion of BME         | 6867 (24.5)                           | 49.8                                  | 1.02 (0.89-1.17)             |          |
| 3                                                 | population                | 6326 (22.6)                           | 45.7                                  | 1.00 (0.86-1.17)             |          |
| 4                                                 |                           | 5725 (20.4)                           | 41.5                                  | 0.89 (0.75-1.06)             |          |
| 5: CCGs with highest proportion                   |                           | 3500 (12.5)                           | 27.2                                  | 0.63 (0.49-0.81)             |          |
| <b>Limiting long-term illness</b>                 |                           |                                       |                                       |                              |          |
| 1: CCGs with lowest proportion                    | Ranked category of        | 4433 (15.8)                           | 32.8                                  | Reference                    | 0.46     |
| 2                                                 | proportion of people with | 6328 (22.6)                           | 44.4                                  | 1.16 (0.99-1.36)             |          |
| 3                                                 | limiting illness          | 4882 (17.4)                           | 43.7                                  | 1.11 (0.91-1.34)             |          |
| 4                                                 |                           | 6896 (24.6)                           | 46.1                                  | 1.12 (0.91-1.39)             |          |
| 5: CCGs with highest proportion                   |                           | 5458 (19.5)                           | 48.9                                  | 1.16 (0.91-1.49)             |          |
| <b>Random effects estimates</b>                   |                           | <b>Standard deviation<sup>†</sup></b> | <b>Standard deviation<sup>‡</sup></b> |                              |          |
|                                                   |                           | <b>(95%CI)</b>                        | <b>(95%CI)</b>                        |                              |          |
| STP-level variation (level 2)                     |                           | 0.23 (0.17-0.31)                      | 0.15 (0.11-0.22)                      |                              |          |
| CCG-level variation (level 1)                     |                           | 0.32 (0.29-0.36)                      | 0.27 (0.24-0.30)                      |                              |          |

Table 2 describes the distribution of regional characteristics and the association between these factors and SUI procedure rates from the multilevel random-intercept Poisson regression model. Abbreviations: CI (Confidence interval); IMD (Index of multiple deprivation); CCG (Clinical Commissioning Group); STP (Sustainability and Transformation Plan); NHS (National Health Service); <sup>†</sup>Unadjusted estimates; <sup>‡</sup>Adjusted for all regional factors including ethnicity. \*P value obtained from likelihood ratio test.

## DISCUSSION

### Main findings

More than 30,000 women were admitted to NHS hospitals in England for an SUI-related surgical treatment between April 2013 and March 2016. The rate of surgery for SUI was 40 procedures per 100,000 women/year. Crude regional rates varied by a factor of eleven among the 209 CCGs from 11 to 120, and a factor of four among 44 STPs from 20 to 77 procedures per 100,000 women/year. These differences were only slightly reduced when the women's age and regional characteristics were taken into account. The overall rate of SUI surgery dropped by a third over the three-year study period whilst the extent of geographic variation remained stable.

### Interpretation

This study, carried out in the English NHS, is the first national study to explore geographic variation in rates of surgical treatment for SUI. Evidence to date regarding geographic variation in benign gynaecological surgery across England focused primarily on surgery for menorrhagia(25, 26) suggesting substantial variation despite the existence of national guidelines.

We found that women's age and regional ethnicity distributions were associated with surgery rates. This may reflect differences in incontinence-related health beliefs, preferences and care seeking behaviour for older women(27) and women from various ethnic backgrounds(18). Studies suggest that only around half of older people seek help for their incontinence symptoms, commonly due to the belief that it is a normal part of ageing.(28, 29) In England, studies concluded that help-seeking behaviour was hindered for South-Asian women as they felt embarrassed to discuss sensitive problems, particularly with a male health professional.(30, 31) Other studies in the Netherlands,(32) Sweden(33) and the USA(34) also found notable differences in preferences across women from different age groups and ethnic backgrounds.

1  
2  
3 We found that older women were less likely to have received surgical treatment for their SUI.  
4 This agrees with findings for other aspects of continence care. A national audit for continence  
5 care in the UK(17) found that deficiencies in the organisation of care and the management of  
6 urinary incontinence were more pronounced for older people.(35) For example, in acute and  
7 primary care settings, older people were less likely to have a continence history or focused  
8 examination done. In secondary care, whilst it has been shown that surgical treatments are  
9 safe and effective in older women,(36) these procedures were used less frequently than in  
10 younger patients(16, 17).  
11  
12  
13  
14  
15  
16  
17  
18  
19  
20

21 In their work on clinical practice variation, Wennberg and colleagues emphasise three factors  
22 as possible sources of variation: clinical uncertainty about the appropriateness of care, regional  
23 differences in patients' preferences for particular treatments , and differences in the capacity  
24 or supply of services(37). In the context of SUI surgery, a part of the observed variation will  
25 reflect the ongoing debate and concerns about the safety of mid-urethral mesh tape  
26 procedures for women with SUI, which in 2018 led to a 'pause' in the use of mesh for the  
27 treatment of stress urinary incontinence(9-11, 14, 15). It is important to note that adjustment  
28 for factors that are likely to affect patients' preferences had little impact on the geographic  
29 variation we observed for SUI surgery. However, patients' preferences will also be strongly  
30 guided by the advice received from their clinicians. The geographic areas used in this study  
31 (CCGs and STPs) are defined by NHS bodies that commission local hospital services which  
32 suggests that differences in capacity of the local healthcare system may have contributed to  
33 the observed variation.  
34  
35  
36  
37  
38  
39  
40  
41  
42  
43  
44  
45  
46

47 The "correct" rate of SUI surgery is difficult to determine, especially given the ongoing concerns  
48 about the safety of mesh tapes. However, with the observed level of geographic variation, it is  
49 likely that women in some areas were more likely to be treated compared to women with the  
50 same condition in other areas. Informed patient choice, shared decision making and improved  
51 communication of the risks and benefits of both mesh and non-mesh procedures(38) is often  
52 proposed as a possible solution(37). NICE, the organisation that develops clinical guidelines for  
53 the English NHS, recommends a multidisciplinary team review prior to offering invasive therapy  
54 for SUI symptoms(4). In light of recent reviews, and the current suspension of mesh tape  
55  
56  
57  
58  
59  
60

1  
2  
3 insertions, NICE's latest draft guidance (published October 2018) also states that non-surgical  
4 options for SUI must be offered before any surgical treatment(39). A better understanding of  
5 relevant, long-term clinical outcomes is also needed(40, 41). With the current level of  
6 uncertainty about the safety and outcomes of mid-urethral mesh tape insertions, it is likely that  
7 the geographic variation we observed will continue.  
8  
9  
10  
11  
12  
13  
14

15 In England, discussions are ongoing about setting up a national prospective registry of mid-  
16 urethral mesh tape insertions to monitor reoperations and removals as outcomes. However,  
17 there is also a clear need to capture a wider range of clinical outcomes that are directly  
18 relevant to women, including recurrent or persistent urinary incontinence, pain, and sexual  
19 dysfunction. These types of outcomes can only be collected if women themselves are actively  
20 involved in the process.  
21  
22  
23  
24  
25  
26  
27  
28

### 29 **Strengths and limitations**

30  
31 The data used comprised information on all surgical procedures performed within the English  
32 NHS, thereby reducing the risk of selection bias. Our statistical modelling, utilising multi-level  
33 empirical Bayes methods allowed for minimising potential estimation error problems and  
34 taking account of area size variations for estimation of credibility intervals(24). This approach  
35 provided a powerful and statistically robust basis for identifying potential outlier areas.  
36  
37  
38  
39  
40  
41  
42

43 Our analyses were subject to limitations inherent to observational studies. Firstly, unmeasured  
44 confounding factors may have contributed to variation in surgery rates. We were unable to  
45 account for potential regional variation in the average severity of the SUI problems. Secondly,  
46 whilst the overall quality of clinical information in HES has been found to be sufficiently high for  
47 research and audit purposes, inaccuracies in coding practices could have introduced some  
48 variation between geographic areas. Finally, we were unable to account for procedures done in  
49 the private sector. Although precise figures are lacking, it is likely that at least 90% of all  
50 incontinence procedures carried out in England are provided by the NHS, given that the total  
51 annual spending on private health care in England is about 5% of the total annual spending on  
52  
53  
54  
55  
56  
57  
58  
59  
60



1  
2  
3 the NHS(42). While our study findings must be interpreted with caution in light of the above  
4 limitations, these are very unlikely to explain the large regional differences observed.  
5  
6  
7  
8

## 9 **CONCLUSION**

10  
11 We found substantial variation in the rates of surgical treatment for female SUI between  
12 geographic regions across England. Adjusting for the women's age group and regional  
13 characteristics reduced variation only slightly. It is likely that the observed variation is in part  
14 linked to the ongoing debate about the safety of mid-urethral mesh tapes leading to  
15 differences in professional opinion about the appropriateness of surgical treatment for female  
16 SUI. This can only be informed by large-scale national studies monitoring long-term outcomes  
17 relevant to patients.  
18  
19  
20  
21  
22  
23  
24  
25  
26  
27  
28  
29  
30  
31  
32  
33  
34  
35  
36  
37  
38  
39  
40  
41  
42  
43  
44  
45  
46  
47  
48  
49  
50  
51  
52  
53  
54  
55  
56  
57  
58  
59  
60

## Acknowledgements

We would like to thank Lynn Copley and Natalie Eugene at the Clinical Effectiveness Unit of the Royal College of Surgeons of England and London School of Hygiene and Tropical Medicine for extracting the required data.

## Disclosure of Interests

All authors received grant funding from the National Institute for Health Research (NIHR) Health Services and Delivery Research (HS&DR) Programme (14/70/162) during the conduct of the study. AM reports personal fees from: Astellas, Pfizer, Contura and Atlantic Medical; and PTH reports personal fees from: Boston Scientific and Ethicon, and grants and personal fees from SEP Pharma outside the submitted work.

## Contribution to Authorship

The study was conceived and designed by all authors (JBM, RSG, DEH, DC, JD, AM, PTH, TM, AW, DGT, JvdM, IGU). JBM and IGU organised the datasets and performed the statistical analysis, JBM wrote the first draft of the manuscript; RSG, IGU, JBM and JvdM wrote the final manuscript, with input from DEH, DC, JD, AM, PTH, TM, AW, DGT. All authors (JBM, RSG, DEH, DC, JD, AM, PTH, TM, AW, DGT, JvdM, IGU) contributed to the interpretation of results and approved the final text. Joint senior authors (IGU and JvdM) and joint first authors (JBM and RSG) made an equal contribution to this study and manuscript.

## Patient Consent and Ethics Approval

The use of Hospital Episode Statistics data for the purpose evaluations of care delivered by the NHS was approved by the Confidentiality Advisory Group of the NHS Health Research Authority (15/CAG/0148). The data are anonymised and therefore their use does not require ethical approval and individual-level patient consent.

**Funding**

This study was supported by a grant from the National Institute for Health Research (NIHR) Health Services and Delivery Research (HS&DR) Programme (14/70/162). Independent scientific review of the proposal has been undertaken by NIHR. However, the authors are solely responsible for any errors or omissions as well as the opinions expressed.

For peer review only

## REFERENCES

1. Hunskaar S, Lose G, Sykes D, Voss S. The prevalence of urinary incontinence in women in four European countries. *BJU Int.* 2004;93(3):324-30.
2. Coyne KS, Kvasz M, Ireland AM, Milsom I, Kopp ZS, Chapple CR. Urinary incontinence and its relationship to mental health and health-related quality of life in men and women in Sweden, the United Kingdom, and the United States. *Eur Urol.* 2012;61(1):88-95. doi: 10.1016/j.eururo.2011.07.049. Epub Jul 26.
3. Papanicolaou S, Hunskaar S, Lose G, Sykes D. Assessment of bothersomeness and impact on quality of life of urinary incontinence in women in France, Germany, Spain and the UK. *BJU Int.* 2005;96(6):831-8.
4. NICE. NICE clinical guideline 171: The management of urinary incontinence in women. 2013.
5. Gornall J. How mesh became a four letter word. *BMJ.* 2018;363:k4137.
6. Withington J, Hirji S, Sahai A. The Changing Face of Urinary Continence Surgery in England: A Perspective from the Hospital Episode Statistics Database. *BJU Int.* 2014.
7. NHS Digital. Retrospective Review of Surgery for Urogynaecological Prolapse and Stress Urinary Incontinence using Tape or Mesh 2018. Available from: <https://digital.nhs.uk/data-and-information/publications/statistical/mesh/apr08-mar17/retrospective-review-of-surgery-for-vaginal-prolapse-and-stress-urinary-incontinence-using-tape-or-mesh-copy>.
8. NHS Digital. Hospital Episode Statistics. Patient admitted care, England 2018. Available from: <https://digital.nhs.uk/data-and-information/publications/statistical/hospital-admitted-patient-care-activity>
9. U.S. Food & Drug Administration. FDA public health notification: serious complications associated with transvaginal placement of surgical mesh in repair of pelvic organ prolapse and stress urinary incontinence 2008.
10. NHS England. Mesh Oversight Group Report. 2017.
11. Scottish Government. Scottish Independent Review of the use, safety and efficacy of transvaginal mesh implants in the treatment of stress urinary incontinence and pelvic organ prolapse in women Edinburgh 2017 [16/09/2017]. Available from: <http://www.gov.scot/Resource/0051/00515856.pdf>.
12. NHS England. Mesh complications. 2017.
13. Leone Roberti Maggiore U, Finazzi Agro E, Soligo M, Li Marzi V, Digesu A, Serati M. Long-term outcomes of TOT and TVT procedures for the treatment of female stress urinary incontinence: a systematic review and meta-analysis. *Int Urogynecology Journal.* 2017;28(8):1119-30.
14. Department of Health and Social Care. Government announces strict rules for the use of vaginal mesh 2018. Available from: <https://www.gov.uk/government/news/government-announces-strict-rules-for-the-use-of-vaginal-mesh>.
15. Department of Health and Social Care. Review launched to respond to patient concerns about NHS treatments 2018. Available from: <https://www.gov.uk/government/news/review-launched-to-respond-to-patient-concerns-about-nhs-treatments>.
16. Gibson W, Wagg A. New horizons: urinary incontinence in older people. *Age Ageing.* 2014;43(2):157-63.
17. Wagg A, Duckett J, McClurg D, Harari D, Lowe D. To what extent are national guidelines for the management of urinary incontinence in women adhered? Data from a national audit. *BJOG: An International Journal of Obstetrics & Gynaecology.* 2011;118(13):1592-600.
18. Siddiqui NY, Levin PJ, Phadtare A, Pietrobon R, Ammarell N. Perceptions about female urinary incontinence: a systematic review. *Int Urogynecol J.* 2013.
19. NHS Digital. OPCS-4 2018 [01/12/18]. Available from: [https://hscic.kahootz.com/connect.ti/t\\_c\\_home/view?objectId=297875](https://hscic.kahootz.com/connect.ti/t_c_home/view?objectId=297875).
20. World Health Organization. International Statistical Classification of Diseases and Related Health Problems 10th Revision 2018 [01/12/2018]. Available from: <https://icd.who.int/browse10/2016/en>.

- 1
- 2
- 3
- 4 21. NHS England. Sustainability and Transformation Plans (STPs): Local plans to improve health and
- 5 care [cited 2017 27 April]. Available from: <https://www.england.nhs.uk/stps/>.
- 6
- 7 22. ONS. Table 1 2011 Census: Usual resident population by five-year age group and sex, United
- 8 Kingdom and constituent countries 2011.
- 9 23. Department for Communities and Local Government. The English indices of deprivation 2015.
- 10 Available from: <https://www.gov.uk/government/collections/english-indices-of-deprivation>.
- 11 24. Greenland S. Principles of multilevel modelling. *Int J Epidemiol*. 2000;29(1):158-67.
- 12 25. Cromwell DA, Mahmood TA, Templeton A, van der Meulen JH. Surgery for menorrhagia within
- 13 English regions: variation in rates of endometrial ablation and hysterectomy. *Bjog*. 2009;116(10):1373-9.
- 14 26. Bottle A, Aylin P. Variations in vaginal and abdominal hysterectomy by region and trust in
- 15 England. *BJOG*. 2005;112(3):326-8.
- 16 27. Strickland R. Reasons for not seeking care for urinary incontinence in older community-dwelling
- 17 women: a contemporary review. *Urol Nurs*. 2014;34(2):63-8, 94.
- 18 28. Shaw C, Tansey R, Jackson C, Hyde C, Allan R. Barriers to help seeking in people with urinary
- 19 symptoms. *Fam Pract*. 2001;18(1):48-52.
- 20 29. Horrocks S, Somerset M, Stoddart H, Peters TJ. What prevents older people from seeking
- 21 treatment for urinary incontinence? A qualitative exploration of barriers to the use of community
- 22 continence services. *Fam Pract*. 2004;21(6):689-96.
- 23 30. Wells M, Wagg A. Integrated continence services and the female Bangladeshi population. *Br J*
- 24 *Nurs*. 2007;16(9):516-9.
- 25 31. Doshani A, Pitchforth E, Mayne CJ, Tincello DG. Culturally sensitive continence care: a
- 26 qualitative study among South Asian Indian women in Leicester. *Fam Pract*. 2007;24(6):585-93.
- 27 32. Teunissen D, van Weel C, Lagro-Janssen T. Urinary incontinence in older people living in the
- 28 community: examining help-seeking behaviour. *Br J Gen Pract*. 2005;55(519):776-82.
- 29 33. Andersson G, Johansson JE, Nilsson K, Sahlberg-Blom E. Perceptions of urinary incontinence
- 30 among Syrian Christian women living in Sweden. *J Transcult Nurs*. 2009;20(3):296-303.
- 31 34. Welch LC, Botelho EM, Tennstedt SL. Race and ethnic differences in health beliefs about lower
- 32 urinary tract symptoms. *Nurs Res*. 2011;60(3):165-72.
- 33 35. Wagg A, Potter J, Peel P, Irwin P, Lowe D, Pearson M. National audit of continence care for older
- 34 people: management of urinary incontinence. *Age Ageing*. 2008;37(1):39-44.
- 35 36. Franzen K, Andersson G, Odeberg J, Midlov P, Samuelsson E, Stenzelius K, et al. Surgery for
- 36 urinary incontinence in women 65 years and older: a systematic review. *Int Urogynecol J*.
- 37 2015;26(8):1095-102.
- 38 37. Wennberg JE. Time to tackle unwarranted variations in practice. *BMJ*. 2011;342:d1513.
- 39 38. Fusco F, Abdel-Fattah M, Chapple CR, Creta M, La Falce S, Waltregny D, et al. Updated
- 40 Systematic Review and Meta-analysis of the Comparative Data on Colposuspensions, Pubovaginal Slings,
- 41 and Midurethral Tapes in the Surgical Treatment of Female Stress Urinary Incontinence. *Eur Urol*.
- 42 2017;72(4):567-91.
- 43 39. NICE. Guideline: Urinary incontinence and pelvic organ prolapse in women: management. Draft
- 44 for consultation. 2018.
- 45 40. Keltie K, Elneil S, Monga A, Patrick H, Powell J, Campbell B, et al. Complications following vaginal
- 46 mesh procedures for stress urinary incontinence: an 8 year study of 92,246 women. *Scientific Reports*.
- 47 2017;7(1):12015.
- 48 41. Morling J, McAllister D, Agur W, Fischbacher C, Glazener C, Guerrero K, et al. Adverse events
- 49 after first, single, mesh and non-mesh surgical procedures for stress urinary incontinence and pelvic
- 50 organ prolapse in Scotland, 1997–2016: a population-based cohort study. *The Lancet*.
- 51 2017;389(10069):629-40.
- 52 42. King's Fund. The UK private health market. 2014.
- 53
- 54
- 55
- 56
- 57
- 58
- 59
- 60

## List of Figures & Legends

### Figure 1: Study cohort selection process

**Figure Legend:** Figure 1 is a flow diagram of the inclusion process for women who received surgical treatment for SUI in England. Data extracted from Hospital Episode Statistics 2013 – 2016. Abbreviations: SUI (stress urinary incontinence); ICD-10 (International Classification of Diseases, version 10) Office for Population Censuses and Surveys Classification; N39.3 (Stress urinary incontinence ICD-10 code).

### Figure 2: CCG-level rates of stress urinary incontinence procedures between 2013 and 2016

**Figure Legend:** Figure 2 shows the empirical Bayes (EB) estimated procedure rates for stress urinary incontinence. The vertical axes in (a) and (b) are EB rates. Rates in (b) are risk-adjusted for age, socio economic status, ethnicity and long-term illness. The numbers on the horizontal axis represent the assigned position of the CCG ranked according to rates. Geographical mapping in (c) highlight the locations of CCGs with the lowest to highest range of procedure rates in England as well as an expanded section of the London Commissioning Region (CR). CCGs were not labelled because of space constraints.

### Figure 3: STP-level rates of stress urinary incontinence procedures between 2013 and 2016

**Figure Legend:** Figure 3 shows the empirical Bayes (EB) estimated procedure rates for stress urinary incontinence. The vertical axes in (a) and (b) are EB rates. Rates in (b) are risk-adjusted for age, socio economic status, ethnicity and long-term illness. The numbers on the horizontal axis represent the assigned position of the STP footprint ranked according to rates. Geographical mapping in (c) highlight the locations of STP footprints with the lowest to highest range of procedure rates.

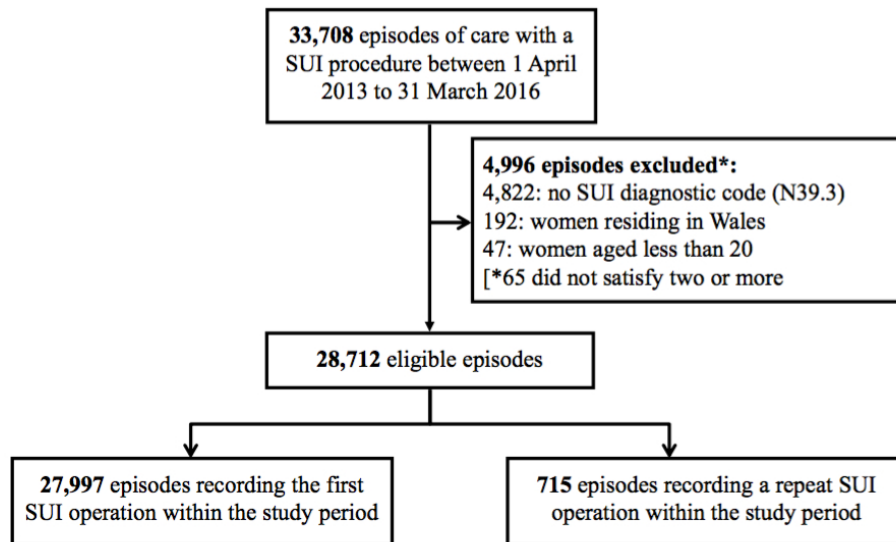

26 Study cohort selection process

27 Figure 1 is a flow diagram of the inclusion process for women who received surgical treatment for SUI in  
 28 England. Data extracted from Hospital Episode Statistics 2013 – 2016. Abbreviations: SUI (stress urinary  
 29 incontinence); ICD-10 (International Classification of Diseases, version 10) Office for Population Censuses  
 30 and Surveys Classification; N39.3 (Stress urinary incontinence ICD-10 code).

31 346x209mm (72 x 72 DPI)

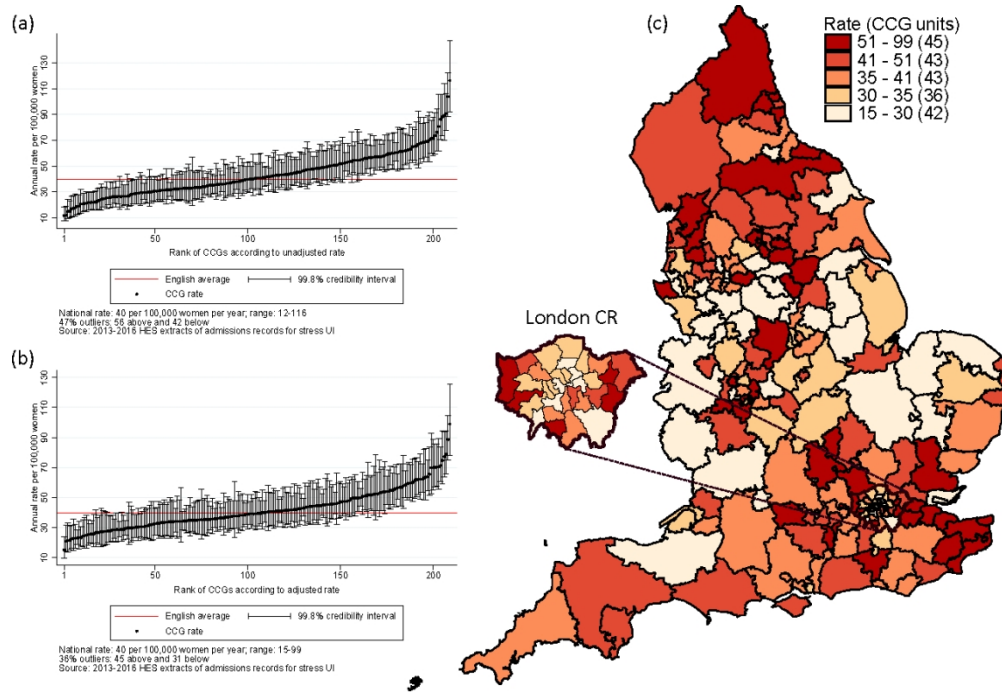

CCG-level rates of stress urinary incontinence procedures between 2013 and 2016

Figure 2 shows the empirical Bayes (EB) estimated procedure rates for stress urinary incontinence. The vertical axes in (a) and (b) are EB rates. Rates in (b) are risk-adjusted for age, socio economic status, ethnicity and long-term illness. The numbers on the horizontal axis represent the assigned position of the CCG ranked according to rates. Geographical mapping in (c) highlight the locations of CCGs with the lowest to highest range of procedure rates in England as well as an expanded section of the London Commissioning Region (CR). CCGs were not labelled because of space constraints.

165x113mm (200 x 200 DPI)



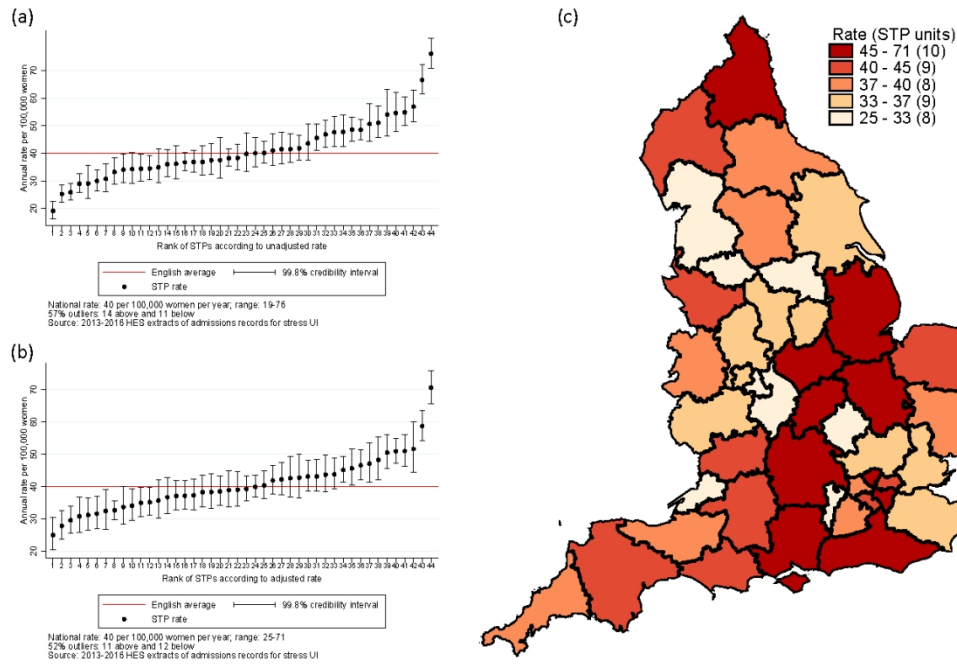

### STP-level rates of stress urinary incontinence procedures between 2013 and 2016

Figure 3 shows the empirical Bayes (EB) estimated procedure rates for stress urinary incontinence. The vertical axes in (a) and (b) are EB rates. Rates in (b) are risk-adjusted for age, socio economic status, ethnicity and long-term illness. The numbers on the horizontal axis represent the assigned position of the STP footprint ranked according to rates. Geographical mapping in (c) highlight the locations of STP footprints with the lowest to highest range of procedure rates.

169x114mm (200 x 200 DPI)

STROBE Statement—Checklist of items that should be included in reports of *cohort studies*

|                              | Item No | Recommendation                                                                                                                                                                                    | Page Number    |
|------------------------------|---------|---------------------------------------------------------------------------------------------------------------------------------------------------------------------------------------------------|----------------|
| <b>Title and abstract</b>    | 1       | (a) Indicate the study's design with a commonly used term in the title or the abstract                                                                                                            | 1              |
|                              |         | (b) Provide in the abstract an informative and balanced summary of what was done and what was found                                                                                               | 2              |
| <b>Introduction</b>          |         |                                                                                                                                                                                                   |                |
| Background/rationale         | 2       | Explain the scientific background and rationale for the investigation being reported                                                                                                              | 4              |
| Objectives                   | 3       | State specific objectives, including any prespecified hypotheses                                                                                                                                  | 4              |
| <b>Methods</b>               |         |                                                                                                                                                                                                   |                |
| Study design                 | 4       | Present key elements of study design early in the paper                                                                                                                                           | 5              |
| Setting                      | 5       | Describe the setting, locations, and relevant dates, including periods of recruitment, exposure, follow-up, and data collection                                                                   | 5              |
| Participants                 | 6       | (a) Give the eligibility criteria, and the sources and methods of selection of participants. Describe methods of follow-up                                                                        | 5              |
|                              |         | (b) For matched studies, give matching criteria and number of exposed and unexposed                                                                                                               | 5              |
| Variables                    | 7       | Clearly define all outcomes, exposures, predictors, potential confounders, and effect modifiers. Give diagnostic criteria, if applicable                                                          | 5              |
| Data sources/<br>measurement | 8*      | For each variable of interest, give sources of data and details of methods of assessment (measurement). Describe comparability of assessment methods if there is more than one group              | 5              |
| Bias                         | 9       | Describe any efforts to address potential sources of bias                                                                                                                                         |                |
| Study size                   | 10      | Explain how the study size was arrived at                                                                                                                                                         | 5              |
| Quantitative variables       | 11      | Explain how quantitative variables were handled in the analyses. If applicable, describe which groupings were chosen and why                                                                      | 5-6            |
| Statistical methods          | 12      | (a) Describe all statistical methods, including those used to control for confounding                                                                                                             | 6              |
|                              |         | (b) Describe any methods used to examine subgroups and interactions                                                                                                                               | 6              |
|                              |         | (c) Explain how missing data were addressed                                                                                                                                                       | 6              |
|                              |         | (d) If applicable, explain how loss to follow-up was addressed                                                                                                                                    |                |
|                              |         | (e) Describe any sensitivity analyses                                                                                                                                                             |                |
| <b>Results</b>               |         |                                                                                                                                                                                                   |                |
| Participants                 | 13*     | (a) Report numbers of individuals at each stage of study—eg numbers potentially eligible, examined for eligibility, confirmed eligible, included in the study, completing follow-up, and analysed | 7 and Figure 1 |
|                              |         | (b) Give reasons for non-participation at each stage                                                                                                                                              | Figure 1       |
|                              |         | (c) Consider use of a flow diagram                                                                                                                                                                | Figure 1       |
| Descriptive data             | 14*     | (a) Give characteristics of study participants (eg demographic, clinical, social) and information on exposures and potential confounders                                                          | Table 2        |
|                              |         | (b) Indicate number of participants with missing data for each variable of interest                                                                                                               | Figure 1       |
|                              |         | (c) Summarise follow-up time (eg, average and total amount)                                                                                                                                       |                |

|    |                          |     |                                                                                                                                                                                                              |               |
|----|--------------------------|-----|--------------------------------------------------------------------------------------------------------------------------------------------------------------------------------------------------------------|---------------|
| 1  | Outcome data             | 15* | Report numbers of outcome events or summary measures over time                                                                                                                                               | 7 and Table 2 |
| 2  |                          |     |                                                                                                                                                                                                              |               |
| 3  |                          |     |                                                                                                                                                                                                              |               |
| 4  | Main results             | 16  | (a) Give unadjusted estimates and, if applicable, confounder-adjusted estimates and their precision (eg, 95% confidence interval). Make clear which confounders were adjusted for and why they were included | Table 2       |
| 5  |                          |     |                                                                                                                                                                                                              |               |
| 6  |                          |     |                                                                                                                                                                                                              |               |
| 7  |                          |     |                                                                                                                                                                                                              |               |
| 8  |                          |     |                                                                                                                                                                                                              |               |
| 9  |                          |     | (b) Report category boundaries when continuous variables were categorized                                                                                                                                    |               |
| 10 |                          |     |                                                                                                                                                                                                              |               |
| 11 |                          |     |                                                                                                                                                                                                              |               |
| 12 |                          |     | (c) If relevant, consider translating estimates of relative risk into absolute risk for a meaningful time period                                                                                             |               |
| 13 |                          |     |                                                                                                                                                                                                              |               |
| 14 | Other analyses           | 17  | Report other analyses done—eg analyses of subgroups and interactions, and sensitivity analyses                                                                                                               |               |
| 15 |                          |     |                                                                                                                                                                                                              |               |
| 16 |                          |     |                                                                                                                                                                                                              |               |
| 17 | <b>Discussion</b>        |     |                                                                                                                                                                                                              |               |
| 18 | Key results              | 18  | Summarise key results with reference to study objectives                                                                                                                                                     | 12            |
| 19 | Limitations              | 19  | Discuss limitations of the study, taking into account sources of potential bias or imprecision. Discuss both direction and magnitude of any potential bias                                                   | 14-15         |
| 20 |                          |     |                                                                                                                                                                                                              |               |
| 21 |                          |     |                                                                                                                                                                                                              |               |
| 22 |                          |     |                                                                                                                                                                                                              |               |
| 23 | Interpretation           | 20  | Give a cautious overall interpretation of results considering objectives, limitations, multiplicity of analyses, results from similar studies, and other relevant evidence                                   | 12-13         |
| 24 |                          |     |                                                                                                                                                                                                              |               |
| 25 |                          |     |                                                                                                                                                                                                              |               |
| 26 |                          |     |                                                                                                                                                                                                              |               |
| 27 | Generalisability         | 21  | Discuss the generalisability (external validity) of the study results                                                                                                                                        | 12            |
| 28 |                          |     |                                                                                                                                                                                                              |               |
| 29 | <b>Other information</b> |     |                                                                                                                                                                                                              |               |
| 30 | Funding                  | 22  | Give the source of funding and the role of the funders for the present study and, if applicable, for the original study on which the present article is based                                                | 17            |
| 31 |                          |     |                                                                                                                                                                                                              |               |
| 32 |                          |     |                                                                                                                                                                                                              |               |
| 33 |                          |     |                                                                                                                                                                                                              |               |

\*Give information separately for exposed and unexposed groups.

**Note:** An Explanation and Elaboration article discusses each checklist item and gives methodological background and published examples of transparent reporting. The STROBE checklist is best used in conjunction with this article (freely available on the Web sites of PLoS Medicine at <http://www.plosmedicine.org/>, Annals of Internal Medicine at <http://www.annals.org/>, and Epidemiology at <http://www.epidem.com/>). Information on the STROBE Initiative is available at <http://www.strobe-statement.org>.

# BMJ Open

## GEOGRAPHICAL VARIATION IN RATES OF SURGICAL TREATMENT FOR FEMALE STRESS URINARY INCONTINENCE IN ENGLAND: A NATIONAL COHORT STUDY

|                                 |                                                                                                                                                                                                                                                                                                                                                                                                                                                                                                                                                                                                                                                                                                                                                                                                                                                                                                                                                                                                                                                                                                        |
|---------------------------------|--------------------------------------------------------------------------------------------------------------------------------------------------------------------------------------------------------------------------------------------------------------------------------------------------------------------------------------------------------------------------------------------------------------------------------------------------------------------------------------------------------------------------------------------------------------------------------------------------------------------------------------------------------------------------------------------------------------------------------------------------------------------------------------------------------------------------------------------------------------------------------------------------------------------------------------------------------------------------------------------------------------------------------------------------------------------------------------------------------|
| Journal:                        | <i>BMJ Open</i>                                                                                                                                                                                                                                                                                                                                                                                                                                                                                                                                                                                                                                                                                                                                                                                                                                                                                                                                                                                                                                                                                        |
| Manuscript ID                   | bmjopen-2019-029878.R1                                                                                                                                                                                                                                                                                                                                                                                                                                                                                                                                                                                                                                                                                                                                                                                                                                                                                                                                                                                                                                                                                 |
| Article Type:                   | Research                                                                                                                                                                                                                                                                                                                                                                                                                                                                                                                                                                                                                                                                                                                                                                                                                                                                                                                                                                                                                                                                                               |
| Date Submitted by the Author:   | 01-Jul-2019                                                                                                                                                                                                                                                                                                                                                                                                                                                                                                                                                                                                                                                                                                                                                                                                                                                                                                                                                                                                                                                                                            |
| Complete List of Authors:       | Mamza, Jil; London School of Hygiene and Tropical Medicine Faculty of Public Health and Policy, Department of Health Services Research and Policy<br>Geary, Rebecca; London School of Hygiene and Tropical Medicine Faculty of Public Health and Policy, Department of Health Services Research and Policy; University College London, Department of Infection and Population Health<br>El-Hamamsy, Dina; University Hospitals of Leicester NHS Trust, Obstetrics and Gynaecology Department<br>Cromwell, David; London School of Hygiene and Tropical Medicine<br>Duckett, Jonathan; Medway NHS Foundation Trust<br>Monga, Ash ; University of Southampton<br>Tooze-Hobson, Philip; Birmingham Women's and Children's NHS Foundation Trust<br>Mahmood, Tahir; Forth Park Hospital, Obstetrics and Gynaecology<br>Wilson, Andrew; University of Leicester, Health Sciences<br>Tincello , Doug ; University of Leicester<br>van der Meulen, Jan; London School of Hygiene and Tropical Medicine<br>Gurol Urganci, Ipek; London School of Hygiene & Tropical Medicine, Health Services Research & Policy |
| <b>Primary Subject Heading</b>: | Health services research                                                                                                                                                                                                                                                                                                                                                                                                                                                                                                                                                                                                                                                                                                                                                                                                                                                                                                                                                                                                                                                                               |
| Secondary Subject Heading:      | Obstetrics and gynaecology                                                                                                                                                                                                                                                                                                                                                                                                                                                                                                                                                                                                                                                                                                                                                                                                                                                                                                                                                                                                                                                                             |
| Keywords:                       | Urogynaecology < GYNAECOLOGY, Geographical mapping < TROPICAL MEDICINE, Minimally invasive surgery < GYNAECOLOGY                                                                                                                                                                                                                                                                                                                                                                                                                                                                                                                                                                                                                                                                                                                                                                                                                                                                                                                                                                                       |
|                                 |                                                                                                                                                                                                                                                                                                                                                                                                                                                                                                                                                                                                                                                                                                                                                                                                                                                                                                                                                                                                                                                                                                        |

SCHOLARONE™  
Manuscripts

1  
2  
3  
4 **GEOGRAPHICAL VARIATION IN RATES OF SURGICAL TREATMENT FOR FEMALE STRESS**  
5 **URINARY INCONTINENCE IN ENGLAND: A NATIONAL COHORT STUDY**  
6

7  
8 Jil B Mamza<sup>1\*</sup>, Rebecca S Geary<sup>1\*</sup>, Dina El-Hamamsy<sup>2</sup>, David Cromwell<sup>1</sup>, Jonathan Duckett<sup>3</sup>,  
9  
10 Ash Monga<sup>4</sup>, Philip Tooze-Hobson<sup>5</sup>, Tahir Mahmood<sup>6</sup>, Andrew Wilson<sup>7</sup>, Douglas G Tincello<sup>7</sup>,  
11  
12 Jan van der Meulen<sup>1#</sup>, Ipek Gurol-Urganci<sup>1#</sup>  
13  
14  
15

16 <sup>1</sup> Department of Health Services Research and Policy, London School of Hygiene & Tropical Medicine

17 <sup>2</sup> Obstetrics and Gynaecology Department, University Hospitals of Leicester

18 <sup>3</sup> Medway NHS Foundation Trust

19 <sup>4</sup> University Hospital Southampton NHS Foundation Trust

20 <sup>5</sup> Birmingham Women's NHS Foundation Trust

21 <sup>6</sup> NHS Fife, Victoria Hospital

22 <sup>7</sup> Department of Health Sciences, University of Leicester  
23  
24  
25  
26  
27  
28  
29  
30  
31  
32

33 *\* Joint first authors have made an equal contribution to this study and manuscript*

34 *# Joint senior authors have made an equal contribution to this study and manuscript*  
35  
36  
37

38 **Corresponding Author**

39 Ipek Gurol-Urganci

40  
41  
42 Department of Health Services Research and Policy  
43 London School of Hygiene & Tropical Medicine  
44 15-17 Tavistock Place, London WC1H 9SH, United Kingdom  
45 Telephone: +44 (0)20 7927 2266  
46  
47

48 Email: [ipek.gurol@lshtm.ac.uk](mailto:ipek.gurol@lshtm.ac.uk)  
49  
50  
51

52 **Word count:** 2257 words

53 **Running title:** Variation in surgery for female stress urinary incontinence  
54  
55  
56  
57  
58  
59  
60

## ABSTRACT

**Objective** To examine geographic variation in use of surgery for female stress urinary incontinence (SUI), mainly mid-urethral mesh tape insertions, in the English National Health Service (NHS).

**Design** National cohort study

**Setting** NHS hospitals

**Participants** 27,997 women aged 20 years or older who had a first stress urinary incontinence surgery in an English NHS Hospital between April 2013 and March 2016 and a diagnosis of stress urinary incontinence at the same time as the procedure

**Methods** Multilevel Poisson regression was used to adjust for geographic differences in age, ethnicity, prevalence of long-term illness and socio-economic deprivation.

**Primary outcome measure** Rate of surgery for stress urinary incontinence per 100,000 women/year at two geographic levels: Clinical Commissioning Group (CCG, n=209) and Sustainability and Transformation Partnership (STP, n=44).

**Results** The rate of surgery for stress urinary incontinence was 40 procedures per 100,000 women/year. Risk-adjusted rates ranged from 20 to 106 procedures per 100,000 women/year across CCGs and 24 to 69 procedures per 100,000 women/year across the STP areas. These regional differences were only partially explained by demographic characteristics as adjustment reduced variance of surgery rates by 16% among the CCGs and 35% among the STPs.

**Conclusions** Substantial geographic variation exists in use of surgery for female stress urinary incontinence in the English NHS, suggesting that women in some areas are more likely to be treated compared to women with the same condition in other areas. The variation reflects differences in how national guidelines are being interpreted, in the context of the ongoing debate about the safety of SUI surgery.

**Funding** National Institute for Health Research (NIHR) Health Services and Delivery Research (HS&DR) Programme (14/70/162)

**Keywords:** Stress urinary incontinence, mid-urethral mesh tape, geographical variation.

## Article Summary

### Strengths and limitations of this study

- The data used for the study includes all surgical procedures performed within English NHS Hospitals, reducing the risk of selection bias
- Statistical modelling, utilising multi-level empirical Bayes methods was used to minimise potential estimation error problems when identifying potential outlier areas
- Unmeasured confounding factors and differences in coding practices may have contributed to variation in surgery rates
- This study did not account for surgical procedures performed in private hospitals. However, it is likely that at least 90% of all continence procedures in England are provided by the NHS, as the total annual spend on private health care in England is approximately 5% of the total annual spend on the NHS.

## INTRODUCTION

Urinary incontinence is estimated to affect 30 to 40% of women in the UK. (1, 2) The condition has a significant impact on quality of life (3), affecting physical and social activities, confidence and self-perception (4). Stress urinary incontinence (SUI), the involuntary loss of urine with increases in abdominal pressure such as when exercising or coughing, is the most commonly diagnosed type of incontinence in women, accounting for approximately 50% of all UI diagnoses (5). Urgency urinary incontinence (UUI) is characterised by a sudden and compelling desire to pass urine that is difficult to defer. Many women experience coexisting stress and urgency UI symptoms, a sub-type often called mixed urinary incontinence. UI is managed at the primary care level initially(6). Lifestyle changes may be recommended in primary care where women with UI also smoking cigarettes, report excessive fluid or caffeine consumption or are overweight or obese(7). Surgical treatments are recommended when conservative treatments are ineffective or not tolerated(8).

Mid-urethral mesh tapes were introduced in 1998 as a novel surgical treatment for female SUI(9). A sharp rise in the use of mesh tapes to treat SUI followed, due in part to the minimally invasive nature of the procedure, with a maximum of 11,365 procedures conducted in 2009. Over the same period, the previous standard treatment for female SUI, colposuspension (a major abdominal surgery) declined from more than 3,500 procedures per year to just 200(10). However, after the peak of more than 11,000 procedures in 2008-09, the number of mesh procedures for SUI has almost halved, falling to just 6227 by 2016-17(11, 12). The decline in the use of mesh tapes for SUI has most likely been in response to concerns about the safety of mesh(13-15) with some women experiencing pain, dyspareunia, persistent urinary incontinence, and exposure or erosion(16, 17). In 2018, the use of mesh tapes to treat SUI was suspended in the NHS in England, following an interim recommendation of the Independent Medicines and Medical Devices Safety Review(18, 19).

Previous studies highlighted that not all women with SUI have equitable access to appropriate incontinence care; access to continence surgery varies by age(20, 21) and ethnic and socio-economic backgrounds;(22) with evidence of variations in care for other



1  
2  
3 vulnerable populations. In light of the current suspension of the use of mid-urethral mesh  
4 tapes, the most commonly used procedures to treat female SUI, evidence is needed  
5 regarding the utilisation of mesh, and non-mesh, surgical continence procedures before the  
6 suspension was in place. A better understanding of geographical differences in access to  
7 surgical treatment for SUI in the English National Health Service (NHS) between 2013 and  
8 2016 and of the factors contributing to this variation will be informative for future policy  
9 decisions about the appropriateness of surgical treatment of female SUI.  
10  
11  
12  
13  
14  
15  
16  
17  
18

## 19 **METHODS**

### 20 **Study design, setting and definitions**

21 This study used data from Hospital Episode Statistics (HES), a routinely collected,  
22 administrative dataset which contains records of all NHS hospital admissions in England. The  
23 cohort comprised women aged 20 years and older who had received surgical treatment for  
24 SUI between 1 April 2013 and 31 March 2016 and had an SUI diagnosis recorded at the time  
25 of the procedure. SUI surgery was defined using UK Office for Population Censuses and  
26 Surveys Classification (OPCS-4) codes (Table 1)(23). SUI diagnosis was defined using the  
27 International Classification of Diseases, ICD-10 code: N39.3 Stress urinary incontinence(24).  
28 Women may have had repeat procedures in the study period, however, only the first  
29 operation was counted in calculating the rate of surgery.  
30  
31  
32  
33  
34  
35  
36  
37  
38  
39  
40  
41  
42

### 43 **Measures**

44 The outcome measure was rate of surgery for SUI per 100,000 women/year at two  
45 geographic levels: 209 Clinical Commissioning Group (CCG) and 44 Sustainability and  
46 Transformation Partnership (STP) areas. CCGs are statutory NHS bodies responsible for the  
47 planning and commissioning of health care services in a local area (average population size  
48 of about 104,000 adult females). CCG areas are grouped into 44 STP areas (average  
49 population size of about 493,000 adult females), which were set up to coordinate  
50 improvements in the delivery of NHS services(25). Reference denominator populations were  
51 derived by aggregating the 2011 Census population counts for women aged 20 and older in  
52 lower super output areas (LSOA) that are within the respective boundaries of the CCG and  
53  
54  
55  
56  
57  
58  
59  
60

1  
2  
3 STP areas. LSOAs are postcode-based hierarchical geographic units designed to improve the  
4 reporting of small area statistics in England and Wales. There are 32,844 LSOAs in England  
5 with an average population approximately 1,700 people (26).  
6  
7  
8  
9

10  
11 Sociodemographic factors may explain variations in rates of surgery for SUI. We handled age  
12 as a patient-level characteristic grouped into five categories (20-39, 40-49, 50-59, 60-69 and  
13 70+ years). Reference group was chosen as 40-49 years of age as surgery for SUI is most  
14 prevalent for this age group. Socio-economic status, ethnicity and limiting long-term illness  
15 were CCG-level characteristics derived from 2011 Census data. For socio-economic status,  
16 we used the averages of the national ranking of the Index of Multiple Deprivation (IMD) (27)  
17 of LSOAs within each CCG, and grouped the CCG averages into national quintiles ranging  
18 from 1 (most deprived CCGs) to 5 (least deprived CCGs). For ethnicity, we used the  
19 percentage of the population reporting black or ethnic minority (BME) background, and for  
20 long-term illness the percentage who reported that their day-to-day activities were limited  
21 because of a health problem or disability which has lasted, or is expected to last, at least 12  
22 months. For each CCG, we took the averages of these percentages for LSOAs and grouped  
23 these CCG averages into national quintiles ranging from 1 (CCGs with average percentages  
24 in the lowest quintile) to 5 (highest quintile).  
25  
26  
27  
28  
29  
30  
31  
32  
33  
34  
35  
36  
37  
38  
39

#### 40 **Statistical analyses**

41  
42 We calculated the number and the unadjusted and adjusted rates per 100,000 women/year  
43 of SUI procedures overall, and according to patient and regional characteristics. Incidence  
44 rate ratios were used to represent associations between the procedure rate and regional  
45 characteristics. Multilevel Poisson regression models were used to produce empirical Bayes  
46 estimates of the unadjusted and adjusted incidence rates for each CCG and STP area. In  
47 addition, risk adjusted regression models were used to assess geographic variation in rates  
48 of surgery by year. The empirical Bayes estimator produces more precise results by “pulling”  
49 the estimates for small outlier regions towards the overall mean(28). For each area level  
50 (CCG/STP), we illustrated the amount of variation in adjusted surgery rates using maps and  
51 range plots with 99.8% credibility intervals. CCGs and STPs were marked as “outliers” where  
52  
53  
54  
55  
56  
57  
58  
59  
60

1  
2  
3 the national average rate of surgery was not within the 99.8% credibility interval of their  
4 rates. All statistical calculations were performed using Stata 14.  
5  
6  
7  
8  
9

### 10 **Patient involvement**

11  
12 This study was supported by a steering group which included lay members and patient  
13 representatives who provided input to the design of the study and interpretation of the  
14 results and contributed to the dissemination plan. The steering group met on a regular  
15 basis for the duration of the study.  
16  
17  
18  
19

## 20 **RESULTS**

### 21 **Description of the cohort**

22  
23 Between April 2013 and March 2016, there were 33,708 inpatient episodes with a surgical  
24 procedure for SUI. 4,996 of these episodes did not satisfy the inclusion criteria, for example,  
25 because they did not have an SUI diagnosis recorded at the time of the procedure, outlined  
26 in Figure 1, and 715 recorded a subsequent operation in the study period (Figure 1). 27,997  
27 procedures were included in the analyses, 90% of which were mid-urethral mesh tape  
28 insertions (Table 1). Restricting our analyses to these 27,997 first SUI procedures captured  
29 >97% of all 28,789 SUI procedures in the study period, and the distribution of procedure  
30 types did not vary between all and first procedures (Table 1). The national annual rate of  
31 surgery was 40 procedures per 100,000 women.  
32  
33  
34  
35  
36  
37  
38  
39  
40  
41  
42  
43  
44  
45  
46  
47  
48  
49  
50  
51  
52  
53  
54  
55  
56  
57  
58  
59  
60

**Table 1: OPCS-4 codes and counts of SUI procedures with relevant diagnosis (ICD-10) code N39.3**

| OPSC-4 | Description                                                                                   | All operations*<br>N (%) | First operations**<br>N (%) |
|--------|-----------------------------------------------------------------------------------------------|--------------------------|-----------------------------|
|        | <b><u>Mid-urethral tape insertions</u></b>                                                    |                          |                             |
| M53.3  | Introduction of tension-free vaginal tape                                                     | 16665 (57.9)             | 16415 (58.6)                |
| M53.6  | Introduction of transobturator tape                                                           | 8866 (30.8)              | 8722 (31.2)                 |
|        | <b><u>Injection of urethral bulking agents</u></b>                                            |                          |                             |
| M56.3  | Endoscopic injection of inert substance into outlet of female bladder                         | 1628 (5.7)               | 1435 (5.1)                  |
|        | <b><u>Other abdominal / vaginal operations</u></b>                                            |                          |                             |
| M51.1  | Abdominoperineal suspension of urethra                                                        | 32 (0.1)                 | 29 (0.1)                    |
| M51.2  | Endoscopic suspension of neck of bladder                                                      | 6 (<0.1)                 | 6 (<0.1)                    |
| M51.8  | Other specified combined abdominal and vaginal operations to support outlet of female bladder | 15 (0.1)                 | 13 (<0.1)                   |
| M51.9  | Unspecified combined abdominal and vaginal operations to support outlet of female bladder     | 2 (<0.1)                 | 2 (<0.1)                    |
| M52.1  | Suprapubic sling operation                                                                    | 355 (1.2)                | 328 (1.2)                   |
| M52.2  | Retropubic suspension of neck of bladder                                                      | 78 (0.3)                 | 76 (0.3)                    |
| M52.3  | Colposuspension of neck of bladder                                                            | 587 (2.0)                | 533 (1.9)                   |
| M52.8  | Other specified abdominal operations to support outlet of female bladder                      | 20 (0.1)                 | 15 (0.1)                    |
| M52.9  | Unspecified abdominal operations to support outlet of female bladder                          | 3 (<0.1)                 | 2 (<0.1)                    |
| M53.1  | Vaginal buttressing of urethra                                                                | 130 (0.5)                | 126 (0.5)                   |
| M53.8  | Other specified vaginal operations to support outlet of female bladder                        | 302 (1.0)                | 216 (0.8)                   |
| M53.9  | Unspecified vaginal operations to support outlet of female bladder                            | 5 (<0.1)                 | 4 (<0.1)                    |
| M55.2  | Implantation of artificial urinary sphincter into outlet of female bladder                    | 18 (0.1)                 | 11 (<0.1)                   |
| M55.6  | Insertion of retropubic device for female stress urinary incontinence NEC                     | 56 (0.2)                 | 52 (0.2)                    |
| M55.8  | Other specified other open operations on outlet of female bladder                             | 14 (<0.1)                | 8 (<0.1)                    |
| M55.9  | Unspecified other open operations on outlet of female bladder                                 | 0 (0)                    | 0 (0)                       |
| M58.8  | Other specified other operations on outlet of female bladder                                  | 7 (<0.1)                 | 4 (<0.1)                    |
| M58.9  | Unspecified other operations on outlet of female bladder                                      | 0 (0)                    | 0 (0)                       |
|        | <b>Total</b>                                                                                  | <b>28789</b>             | <b>27997</b>                |

Abbreviations: SUI (stress urinary incontinence); ICD-10 (International Classification of Diseases, version 10); OPCS (Office for Population Censuses and Surveys Classification); N39.3 (Stress urinary incontinence ICD-10 code). \*For 77 episodes of care out of 28712 eligible episodes, two procedures were recorded and both are included in the overall count. \*\* For episodes of care where two procedures were recorded, only the more invasive or specified procedure is counted as first operation.

## Geographic variations in surgery

Figures 2a and 3a show the variation in the unadjusted empirical Bayes estimates of the procedure rates for SUI across the CCGs and STPs, with figures 2b and 3b illustrating the rates adjusted for patients' age and the CCG-level characteristics: socio-economic status, percentage of the population reporting BME background, and percentage with a long-term illness. Figures 2c and 3c highlight the locations of CCGs/STPs with the lowest to highest range of procedure rates in England.

The adjusted SUI procedure rates for CCGs ranged from 20 to 106 procedures compared with unadjusted rates of 11 to 120 procedures per 100,000 women/year (Figure 2). Ninety-nine CCGs (47%) were marked as "outliers" (where the national average was not within the 99.8% credibility interval of their rate). These comprised 43 CCGs (20.6%) with rates below the national average and 56 CCGs (26.8%) with rates above the national average. Risk adjustment reduced the number of CCGs marked as "outliers" from 99 (47.4%) to 75 (36%). The standard deviation (SD) of the CCG-level variation in adjusted rates (SD 0.27, 95%CI: 0.24-0.30) was 16% lower than the SD of the unadjusted rates (SD 0.32, 95%CI: 0.29-0.36).

The adjusted SUI procedure rates for STPs ranged from 24 to 69 procedures compared with unadjusted rates of 20 to 77 per 100 000 women/year (Figure 3). Risk adjustment reduced the number of STPs identified as outliers from 23 (52%) to 22 (50%). The amount of variation observed declined by 35% after risk adjustment: the SD of the STP-level variation for unadjusted and adjusted model were 0.23 (95%CI: 0.17-0.31) and 0.15 (95%CI: 0.11-0.22) respectively.

Annual SUI procedure rates declined over the study period from 52 per 100,000 women in 2013 to 36 per 100,000 women in 2015. However, there was no evidence that CCG- or STP-level variation changed over time. In separate (adjusted) regression models run by year, the SD of CCG-level variation was 0.26 (95%CI: 0.23-0.30) in 2013; 0.27 (95%CI: 0.23-0.31) in 2014 and 0.29 (95%CI: 0.25-0.34) in 2015. The SD of STP-level variation (adjusted model) was 0.13 (95%CI: 0.08-0.20) in 2013, 0.17 (95%CI: 0.11-0.25) in 2014 and 0.18 (95%CI: 0.12-0.26) in 2015.

### Association of patient and regional characteristics with surgery rates

Table 2 shows the rates of surgery by regional characteristics. Rates were lowest for the 20-39 year age group (16 per 100,000 women/year), and highest for 40-49 year age group (84 per 100,000 women/year), declining with age beyond 50 years. Compared to the rate among women aged 40-49 years, the surgery rate for women aged 50-59 years was 20% lower (IRR 0.80, 95% CI 0.78-0.83), for women aged 60 to 69 years was 46% lower (IRR 0.54, 95% CI 0.52-0.56), and for women aged 70+ years was 69% lower (IRR 0.31, 95% CI 0.30-0.33).

Rates of surgery were lower for areas with higher proportions of BME populations (highest vs lowest quintile IRR 0.63, 95% CI 0.49-0.81). There were no differences in surgery rates according to the proportion of people with long-term limiting illness or socioeconomic deprivation at the CCG-level.

Table 2: Regional characteristics and their association with SUI procedure rates

| Regional factor                                   | Scale of factor (1 unit)                                      | Procedures, n (%)                             | Crude rate per 100,000 women/year             | Procedure rate ratio (95%CI) | P value* |
|---------------------------------------------------|---------------------------------------------------------------|-----------------------------------------------|-----------------------------------------------|------------------------------|----------|
| <b>Age categories</b>                             |                                                               |                                               |                                               |                              |          |
| 20-39                                             | Age group in years                                            | 3253 (11.6)                                   | 15.9                                          | 0.18 (0.17-0.19)             | <0.001   |
| 40-49                                             |                                                               | 9761 (34.9)                                   | 84.4                                          | Reference                    |          |
| 50-59                                             |                                                               | 7496 (26.8)                                   | 67.5                                          | 0.80 (0.78-0.83)             |          |
| 60-69                                             |                                                               | 4352 (15.5)                                   | 46.2                                          | 0.54 (0.52-0.56)             |          |
| ≥70                                               |                                                               | 3135 (11.2)                                   | 26.8                                          | 0.31 (0.30-0.33)             |          |
| <b>Socio-economic status</b>                      |                                                               |                                               |                                               |                              |          |
| Most deprived                                     | Quintile category of IMD ranking                              | 5838 (20.9)                                   | 43.0                                          | Reference                    | 0.84     |
| More deprived                                     |                                                               | 6315 (22.6)                                   | 47.5                                          | 1.08 (0.93-1.25)             |          |
| Average                                           |                                                               | 6371 (22.8)                                   | 47.9                                          | 1.05 (0.89-1.25)             |          |
| Less deprived                                     |                                                               | 5001 (17.9)                                   | 39.9                                          | 1.02 (0.85-1.21)             |          |
| Least deprived                                    |                                                               | 4472 (15.1)                                   | 36.3                                          | 1.05 (0.85-1.29)             |          |
| <b>Black and minority ethnic (BME) population</b> |                                                               |                                               |                                               |                              |          |
| 1: CCGs with lowest proportion                    | Ranked category of proportion of BME population               | 5579 (19.9)                                   | 48.8                                          | Reference                    | 0.001    |
| 2                                                 |                                                               | 6867 (24.5)                                   | 49.8                                          | 1.02 (0.89-1.17)             |          |
| 3                                                 |                                                               | 6326 (22.6)                                   | 45.7                                          | 1.00 (0.86-1.17)             |          |
| 4                                                 |                                                               | 5725 (20.4)                                   | 41.5                                          | 0.89 (0.75-1.06)             |          |
| 5: CCGs with highest proportion                   |                                                               | 3500 (12.5)                                   | 27.2                                          | 0.63 (0.49-0.81)             |          |
| <b>Limiting long-term illness</b>                 |                                                               |                                               |                                               |                              |          |
| 1: CCGs with lowest proportion                    | Ranked category of proportion of people with limiting illness | 4433 (15.8)                                   | 32.8                                          | Reference                    | 0.46     |
| 2                                                 |                                                               | 6328 (22.6)                                   | 44.4                                          | 1.16 (0.99-1.36)             |          |
| 3                                                 |                                                               | 4882 (17.4)                                   | 43.7                                          | 1.11 (0.91-1.34)             |          |
| 4                                                 |                                                               | 6896 (24.6)                                   | 46.1                                          | 1.12 (0.91-1.39)             |          |
| 5: CCGs with highest proportion                   |                                                               | 5458 (19.5)                                   | 48.9                                          | 1.16 (0.91-1.49)             |          |
| <b>Random effects estimates</b>                   |                                                               | <b>Standard deviation<sup>†</sup> (95%CI)</b> | <b>Standard deviation<sup>‡</sup> (95%CI)</b> |                              |          |
| STP-level variation (level 2)                     |                                                               | 0.23 (0.17-0.31)                              | 0.15 (0.11-0.22)                              |                              |          |
| CCG-level variation (level 1)                     |                                                               | 0.32 (0.29-0.36)                              | 0.27 (0.24-0.30)                              |                              |          |

Table 2 describes the distribution of regional characteristics and the association between these factors and SUI procedure rates from the multilevel random-intercept Poisson regression model. Abbreviations: CI (Confidence interval); IMD (Index of multiple deprivation); CCG (Clinical Commissioning Group); STP (Sustainability and Transformation Plan); NHS (National Health Service); <sup>†</sup>Unadjusted estimates; <sup>‡</sup>Adjusted for all regional factors including ethnicity. \*P value obtained from likelihood ratio test.

## DISCUSSION

### Main findings

More than 30,000 women were admitted to NHS hospitals in England for an SUI-related surgical treatment between April 2013 and March 2016. The rate of surgery for SUI was 40 procedures per 100,000 women/year. Crude regional rates varied by a factor of eleven among the 209 CCGs from 11 to 120, and a factor of four among 44 STPs from 20 to 77 procedures per 100,000 women/year. These differences were only slightly reduced when the women's age and regional characteristics were taken into account. The overall rate of SUI surgery dropped by a third over the three-year study period whilst the extent of geographic variation remained stable.

### Interpretation

This study, carried out in the English NHS, is the first national study to explore geographic variation in rates of surgical treatment for SUI. Evidence to date regarding geographic variation in benign gynaecological surgery across England focused primarily on surgery for menorrhagia(29, 30) suggesting substantial variation despite the existence of national guidelines.

We found that women's age and regional ethnicity distributions were associated with surgery rates. This may reflect differences in incontinence-related health beliefs, preferences and care seeking behaviour for older women(31) and women from various ethnic backgrounds(22) or inequitable use of surgical care (32) . Studies suggest that only around half of older people seek help for their incontinence symptoms, commonly due to the belief that it is a normal part of ageing.(33, 34) In England, studies concluded that help-seeking behaviour was hindered for South-Asian women as they felt embarrassed to discuss sensitive problems, particularly with a male health professional.(35, 36) Other studies in the Netherlands,(37) Sweden(38) and the USA(39) also found notable differences in preferences across women from different age groups and ethnic backgrounds.



1  
2  
3 We found that older women were less likely to have received surgical treatment for their SUI.  
4 This agrees with findings for other aspects of continence care. A national audit for continence  
5 care in the UK(20) found that deficiencies in the organisation of care and the management of  
6 urinary incontinence were more pronounced for older people.(40) For example, in acute and  
7 primary care settings, older people were less likely to have a continence history or focused  
8 examination done. In secondary care, whilst it has been shown that surgical treatments are  
9 safe and effective in older women,(41) these procedures were used less frequently than in  
10 younger patients(20 , 42).  
11  
12  
13  
14  
15  
16  
17  
18  
19  
20

21 In their work on clinical practice variation, Wennberg and colleagues emphasise three factors  
22 as possible sources of variation: clinical uncertainty about the appropriateness of care, regional  
23 differences in patients' preferences for particular treatments , and differences in the capacity  
24 or supply of services(43). In the context of SUI surgery, a part of the observed variation will  
25 reflect the ongoing debate and concerns about the safety of mid-urethral mesh tape  
26 procedures for women with SUI, which in 2018 led to a 'pause' in the use of mesh for the  
27 treatment of stress urinary incontinence(13-15, 18, 19). It is important to note that adjustment  
28 for factors that are likely to affect patients' preferences had little impact on the geographic  
29 variation we observed for SUI surgery. However, patients' preferences will also be strongly  
30 guided by the advice received from their clinicians. The geographic areas used in this study  
31 (CCGs and STPs) are defined by NHS bodies that commission local hospital services which  
32 suggests that differences in capacity of the local healthcare system may have contributed to  
33 the observed variation.  
34  
35  
36  
37  
38  
39  
40  
41  
42  
43  
44  
45  
46

47 The "correct" rate of SUI surgery is difficult to determine, especially given the ongoing concerns  
48 about the safety of mesh tapes. However, with the observed level of geographic variation, it is  
49 likely that women in some areas were more likely to be treated compared to women with the  
50 same condition in other areas. Informed patient choice, shared decision making and improved  
51 communication of the risks and benefits of both mesh and non-mesh procedures(44) is often  
52 proposed as a possible solution(43). NICE, the organisation that develops clinical guidelines for  
53 the English NHS, recommends a multidisciplinary team review prior to offering invasive therapy  
54 for SUI symptoms(8). In light of recent reviews, and the current suspension of mesh tape  
55  
56  
57  
58  
59  
60

1  
2  
3 insertions, NICE's latest draft guidance (published October 2018) also states that non-surgical  
4 options for SUI must be offered before any surgical treatment(45). A better understanding of  
5 relevant, long-term clinical outcomes is also needed(46, 47). With the current level of  
6 uncertainty about the safety and outcomes of mid-urethral mesh tape insertions, it is likely that  
7 the geographic variation we observed will continue.  
8  
9  
10  
11  
12  
13  
14

15 In England, discussions are ongoing about setting up a national prospective registry of mid-  
16 urethral mesh tape insertions to monitor reoperations and removals as outcomes. However,  
17 there is also a clear need to capture a wider range of clinical outcomes that are directly  
18 relevant to women, including recurrent or persistent urinary incontinence, pain, and sexual  
19 dysfunction. These types of outcomes can only be collected if women themselves are actively  
20 involved in the process.  
21  
22  
23  
24  
25  
26  
27  
28

### 29 **Strengths and limitations**

30  
31 The data used comprised information on all surgical procedures performed within the English  
32 NHS, thereby reducing the risk of selection bias. Our statistical modelling, utilising multi-level  
33 empirical Bayes methods allowed for minimising potential estimation error problems and  
34 taking account of area size variations for estimation of credibility intervals(28). This approach  
35 provided a powerful and statistically robust basis for identifying potential outlier areas.  
36  
37  
38  
39  
40  
41  
42

43 Our analyses were subject to limitations inherent to observational studies. Firstly, unmeasured  
44 confounding factors may have contributed to variation in surgery rates. We were unable to  
45 account for potential regional variation in the average severity of the SUI problems. Secondly,  
46 whilst the overall quality of clinical information in HES has been found to be sufficiently high for  
47 research and audit purposes, inaccuracies in coding practices could have introduced some  
48 variation between geographic areas. Finally, we were unable to account for procedures done in  
49 the private sector. Although precise figures are lacking, it is likely that at least 90% of all  
50 incontinence procedures carried out in England are provided by the NHS, given that the total  
51 annual spending on private health care in England is about 5% of the total annual spending on  
52  
53  
54  
55  
56  
57  
58  
59  
60

1  
2  
3 the NHS(48). While our study findings must be interpreted with caution in light of the above  
4 limitations, these are very unlikely to explain the large regional differences observed.  
5  
6  
7  
8

## 9 **CONCLUSION**

10  
11 We found substantial variation in the rates of surgical treatment for female SUI between  
12 geographic regions across England. Adjusting for the women's age group and regional  
13 characteristics reduced variation only slightly. It is likely that the observed variation is in part  
14 linked to the ongoing debate about the safety of mid-urethral mesh tapes leading to  
15 differences in professional opinion about the appropriateness of surgical treatment for female  
16 SUI. This can only be informed by large-scale national studies monitoring long-term outcomes  
17 relevant to patients.  
18  
19  
20  
21  
22  
23  
24  
25  
26  
27  
28  
29  
30  
31  
32  
33  
34  
35  
36  
37  
38  
39  
40  
41  
42  
43  
44  
45  
46  
47  
48  
49  
50  
51  
52  
53  
54  
55  
56  
57  
58  
59  
60

## Acknowledgements

We would like to thank Lynn Copley and Natalie Eugene at the Clinical Effectiveness Unit of the Royal College of Surgeons of England and London School of Hygiene and Tropical Medicine for extracting the required data.

## Disclosure of Interests

All authors received grant funding from the National Institute for Health Research (NIHR) Health Services and Delivery Research (HS&DR) Programme (14/70/162) during the conduct of the study. AM reports personal fees from: Astellas, Pfizer, Contura and Atlantic Medical; and PTH reports personal fees from: Boston Scientific and Ethicon, and grants and personal fees from SEP Pharma outside the submitted work.

## Contribution to Authorship

The study was conceived and designed by all authors (JBM, RSG, DEH, DC, JD, AM, PTH, TM, AW, DGT, JvdM, IGU). JBM and IGU organised the datasets and performed the statistical analysis, JBM wrote the first draft of the manuscript; RSG, IGU, JBM and JvdM wrote the final manuscript, with input from DEH, DC, JD, AM, PTH, TM, AW, DGT. All authors (JBM, RSG, DEH, DC, JD, AM, PTH, TM, AW, DGT, JvdM, IGU) contributed to the interpretation of results and approved the final text. Joint senior authors (IGU and JvdM) and joint first authors (JBM and RSG) made an equal contribution to this study and manuscript.

## Patient Consent and Ethics Approval

The use of Hospital Episode Statistics data for the purpose evaluations of care delivered by the NHS was approved by the Confidentiality Advisory Group of the NHS Health Research Authority (15/CAG/0148). The data are anonymised and therefore their use does not require ethical approval and individual-level patient consent.

**Funding**

This study was supported by a grant from the National Institute for Health Research (NIHR) Health Services and Delivery Research (HS&DR) Programme (14/70/162). Independent scientific review of the proposal has been undertaken by NIHR. However, the authors are solely responsible for any errors or omissions as well as the opinions expressed.

**Data availability**

Hospital Episode Statistics data are available on application from NHS Digital.

## REFERENCES

1. Hunskaar S, Lose G, Sykes D, Voss S. The prevalence of urinary incontinence in women in four European countries. *BJU international*. 2004;93(3):324-30.
2. McGrother CW, Donaldson MM, Shaw C, Matthews RJ, Hayward TA, Dallosso HM, et al. Storage symptoms of the bladder: prevalence, incidence and need for services in the UK. *BJU international*. 2004;93(6):763-9.
3. Coyne KS, Kvasz M, Ireland AM, Milsom I, Kopp ZS, Chapple CR. Urinary incontinence and its relationship to mental health and health-related quality of life in men and women in Sweden, the United Kingdom, and the United States. *Eur Urol*. 2012;61(1):88-95. doi: 10.1016/j.eururo.2011.07.049. Epub Jul 26.
4. Papanicolaou S, Hunskaar S, Lose G, Sykes D. Assessment of bothersomeness and impact on quality of life of urinary incontinence in women in France, Germany, Spain and the UK. *BJU international*. 2005;96(6):831-8.
5. Minassian VA, Drutz HP, Al-Badr A. Urinary incontinence as a worldwide problem. *Int J Gynaecol Obstet*. 2003;82(3):327-38.
6. Monz B, Hampel C, Porkess S, Wagg A, Pons ME, Samsioe G, et al. A description of health care provision and access to treatment for women with urinary incontinence in Europe -- a five-country comparison. *Maturitas*. 2005;52 Suppl 2:S3-12.
7. Lukacz ES, Santiago-Lastra Y, Albo ME, Brubaker L. Urinary Incontinence in Women: A Review. *JAMA : the journal of the American Medical Association*. 2017;318(16):1592-604.
8. NICE. NICE clinical guideline 171: The management of urinary incontinence in women. 2013.
9. Gornall J. How mesh became a four letter word. *Bmj*. 2018;363:k4137.
10. Withington J, Hirji S, Sahai A. The Changing Face of Urinary Continence Surgery in England: A Perspective from the Hospital Episode Statistics Database. *BJU international*. 2014.
11. NHS Digital. Retrospective Review of Surgery for Urogynaecological Prolapse and Stress Urinary Incontinence using Tape or Mesh 2018 [Available from: <https://digital.nhs.uk/data-and-information/publications/statistical/mesh/apr08-mar17/retrospective-review-of-surgery-for-vaginal-prolapse-and-stress-urinary-incontinence-using-tape-or-mesh-copy>].
12. NHS Digital. Hospital Episode Statistics. Patient admitted care, England 2018 [Available from: <https://digital.nhs.uk/data-and-information/publications/statistical/hospital-admitted-patient-care-activity>].
13. U.S. Food & Drug Administration. FDA public health notification: serious complications associated with transvaginal placement of surgical mesh in repair of pelvic organ prolapse and stress urinary incontinence 2008.
14. NHS England. Mesh Oversight Group Report. 2017.
15. Scottish Government. Scottish Independent Review of the use, safety and efficacy of transvaginal mesh implants in the treatment of stress urinary incontinence and pelvic organ prolapse in women Edinburgh 2017 [Available from: <http://www.gov.scot/Resource/0051/00515856.pdf>].
16. NHS England. Mesh complications. 2017.
17. Leone Roberti Maggiore U, Finazzi Agro E, Soligo M, Li Marzi V, Digesu A, Serati M. Long-term outcomes of TOT and TVT procedures for the treatment of female stress urinary incontinence: a systematic review and meta-analysis. *Int Urogynecology Journal*. 2017;28(8):1119-30.
18. Department of Health and Social Care. Government announces strict rules for the use of vaginal mesh 2018 [Available from: <https://www.gov.uk/government/news/government-announces-strict-rules-for-the-use-of-vaginal-mesh>].
19. Department of Health and Social Care. Review launched to respond to patient concerns about NHS treatments 2018 [Available from: <https://www.gov.uk/government/news/review-launched-to-respond-to-patient-concerns-about-nhs-treatments>].
20. Wagg A, Duckett J, McClurg D, Harari D, Lowe D. To what extent are national guidelines for the management of urinary incontinence in women adhered? Data from a national audit. *BJOG: An International Journal of Obstetrics & Gynaecology*. 2011;118(13):1592-600.

- 1
- 2
- 3
- 4 21. Gibson W, Wagg A. Are older women more likely to receive surgical treatment for stress urinary
- 5 incontinence since the introduction of the mid-urethral sling? An examination of Hospital Episode
- 6 Statistics data. *BJOG : an international journal of obstetrics and gynaecology*. 2016;123(8):1386-92.
- 7 22. Siddiqui NY, Levin PJ, Phadtare A, Pietrobon R, Ammarell N. Perceptions about female urinary
- 8 incontinence: a systematic review. *International urogynecology journal*. 2013.
- 9 23. NHS Digital. OPCS-4 2018 [Available from:
- 10 [https://hscic.kahootz.com/connect.ti/t\\_c\\_home/view?objectId=297875](https://hscic.kahootz.com/connect.ti/t_c_home/view?objectId=297875).
- 11 24. World Health Organization. International Statistical Classification of Diseases and Related Health
- 12 Problems 10th Revision 2018 [Available from: <https://icd.who.int/browse10/2016/en>.
- 13 25. NHS England. Sustainability and Transformation Plans (STPs): Local plans to improve health and
- 14 care [Available from: <https://www.england.nhs.uk/stps/>.
- 15 26. ONS. Table 1 2011 Census: Usual resident population by five-year age group and sex, United
- 16 Kingdom and constituent countries 2011.
- 17 27. Department for Communities and Local Government. The English indices of deprivation 2015
- 18 [Available from: <https://www.gov.uk/government/collections/english-indices-of-deprivation>.
- 19 28. Greenland S. Principles of multilevel modelling. *Int J Epidemiol*. 2000;29(1):158-67.
- 20 29. Cromwell DA, Mahmood TA, Templeton A, van der Meulen JH. Surgery for menorrhagia within
- 21 English regions: variation in rates of endometrial ablation and hysterectomy. *BJOG : an international*
- 22 *journal of obstetrics and gynaecology*. 2009;116(10):1373-9.
- 23 30. Bottle A, Aylin P. Variations in vaginal and abdominal hysterectomy by region and trust in
- 24 England. *BJOG : an international journal of obstetrics and gynaecology*. 2005;112(3):326-8.
- 25 31. Strickland R. Reasons for not seeking care for urinary incontinence in older community-dwelling
- 26 women: a contemporary review. *Urologic nursing*. 2014;34(2):63-8, 94.
- 27 32. Geary RS, Gurol-Urganci I, Kiran A, Cromwell DA, Bansi-Matharu L, Shakespeare J, et al. Factors
- 28 associated with receiving surgical treatment for menorrhagia in England and Wales: findings from a
- 29 cohort study of the National Heavy Menstrual Bleeding Audit. *BMJ open*. 2019;9(2):e024260.
- 30 33. Shaw C, Tansey R, Jackson C, Hyde C, Allan R. Barriers to help seeking in people with urinary
- 31 symptoms. *Family practice*. 2001;18(1):48-52.
- 32 34. Horrocks S, Somerset M, Stoddart H, Peters TJ. What prevents older people from seeking
- 33 treatment for urinary incontinence? A qualitative exploration of barriers to the use of community
- 34 continence services. *Family practice*. 2004;21(6):689-96.
- 35 35. Wells M, Wagg A. Integrated continence services and the female Bangladeshi population. *British*
- 36 *journal of nursing*. 2007;16(9):516-9.
- 37 36. Doshani A, Pitchforth E, Mayne CJ, Tincello DG. Culturally sensitive continence care: a
- 38 qualitative study among South Asian Indian women in Leicester. *Family practice*. 2007;24(6):585-93.
- 39 37. Teunissen D, van Weel C, Lagro-Janssen T. Urinary incontinence in older people living in the
- 40 community: examining help-seeking behaviour. *The British journal of general practice : the journal of*
- 41 *the Royal College of General Practitioners*. 2005;55(519):776-82.
- 42 38. Andersson G, Johansson JE, Nilsson K, Sahlberg-Blom E. Perceptions of urinary incontinence
- 43 among Syrian Christian women living in Sweden. *J Transcult Nurs*. 2009;20(3):296-303.
- 44 39. Welch LC, Botelho EM, Tennstedt SL. Race and ethnic differences in health beliefs about lower
- 45 urinary tract symptoms. *Nurs Res*. 2011;60(3):165-72.
- 46 40. Wagg A, Potter J, Peel P, Irwin P, Lowe D, Pearson M. National audit of continence care for older
- 47 people: management of urinary incontinence. *Age and ageing*. 2008;37(1):39-44.
- 48 41. Franzen K, Andersson G, Odeberg J, Midlov P, Samuelsson E, Stenzelius K, et al. Surgery for
- 49 urinary incontinence in women 65 years and older: a systematic review. *International urogynecology*
- 50 *journal*. 2015;26(8):1095-102.
- 51 42. Gibson W, Wagg A. New horizons: urinary incontinence in older people. *Age and ageing*.
- 52 2014;43(2):157-63.
- 53 43. Wennberg JE. Time to tackle unwarranted variations in practice. *Bmj*. 2011;342:d1513.
- 54
- 55
- 56
- 57
- 58
- 59
- 60

- 1  
2  
3  
4  
5  
6  
7  
8  
9  
10  
11  
12  
13  
14  
15  
16  
17  
18  
19  
20  
21  
22  
23  
24  
25  
26  
27  
28  
29  
30  
31  
32  
33  
34  
35  
36  
37  
38  
39  
40  
41  
42  
43  
44  
45  
46  
47  
48  
49  
50  
51  
52  
53  
54  
55  
56  
57  
58  
59  
60
44. Fusco F, Abdel-Fattah M, Chapple CR, Creta M, La Falce S, Waltregny D, et al. Updated Systematic Review and Meta-analysis of the Comparative Data on Colposuspensions, Pubovaginal Slings, and Midurethral Tapes in the Surgical Treatment of Female Stress Urinary Incontinence. *European urology*. 2017;72(4):567-91.
45. NICE. Guideline: Urinary incontinence and pelvic organ prolapse in women: management. Draft for consultation. 2018.
46. Keltie K, Elneil S, Monga A, Patrick H, Powell J, Campbell B, et al. Complications following vaginal mesh procedures for stress urinary incontinence: an 8 year study of 92,246 women. *Scientific Reports*. 2017;7(1):12015.
47. Morling J, McAllister D, Agur W, Fischbacher C, Glazener C, Guerrero K, et al. Adverse events after first, single, mesh and non-mesh surgical procedures for stress urinary incontinence and pelvic organ prolapse in Scotland, 1997–2016: a population-based cohort study. *The Lancet*. 2017;389(10069):629-40.
48. King's Fund. The UK private health market. 2014.



## List of Figures & Legends

### Figure 1: Study cohort selection process

**Figure Legend:** Figure 1 is a flow diagram of the inclusion process for women who received surgical treatment for SUI in England. Data extracted from Hospital Episode Statistics 2013 – 2016. Abbreviations: SUI (stress urinary incontinence); ICD-10 (International Classification of Diseases, version 10) Office for Population Censuses and Surveys Classification; N39.3 (Stress urinary incontinence ICD-10 code).

### Figure 2: CCG-level rates of stress urinary incontinence procedures between 2013 and 2016

**Figure Legend:** Figure 2 shows the empirical Bayes (EB) estimated procedure rates for stress urinary incontinence. The vertical axes in (a) and (b) are EB rates. Rates in (b) are risk-adjusted for age, socio economic status, ethnicity and long-term illness. The numbers on the horizontal axis represent the assigned position of the CCG ranked according to rates. Geographical mapping in (c) highlight the locations of CCGs with the lowest to highest range of procedure rates in England as well as an expanded section of the London Commissioning Region (CR). CCGs were not labelled because of space constraints.

### Figure 3: STP-level rates of stress urinary incontinence procedures between 2013 and 2016

**Figure Legend:** Figure 3 shows the empirical Bayes (EB) estimated procedure rates for stress urinary incontinence. The vertical axes in (a) and (b) are EB rates. Rates in (b) are risk-adjusted for age, socio economic status, ethnicity and long-term illness. The numbers on the horizontal axis represent the assigned position of the STP footprint ranked according to rates. Geographical mapping in (c) highlight the locations of STP footprints with the lowest to highest range of procedure rates.

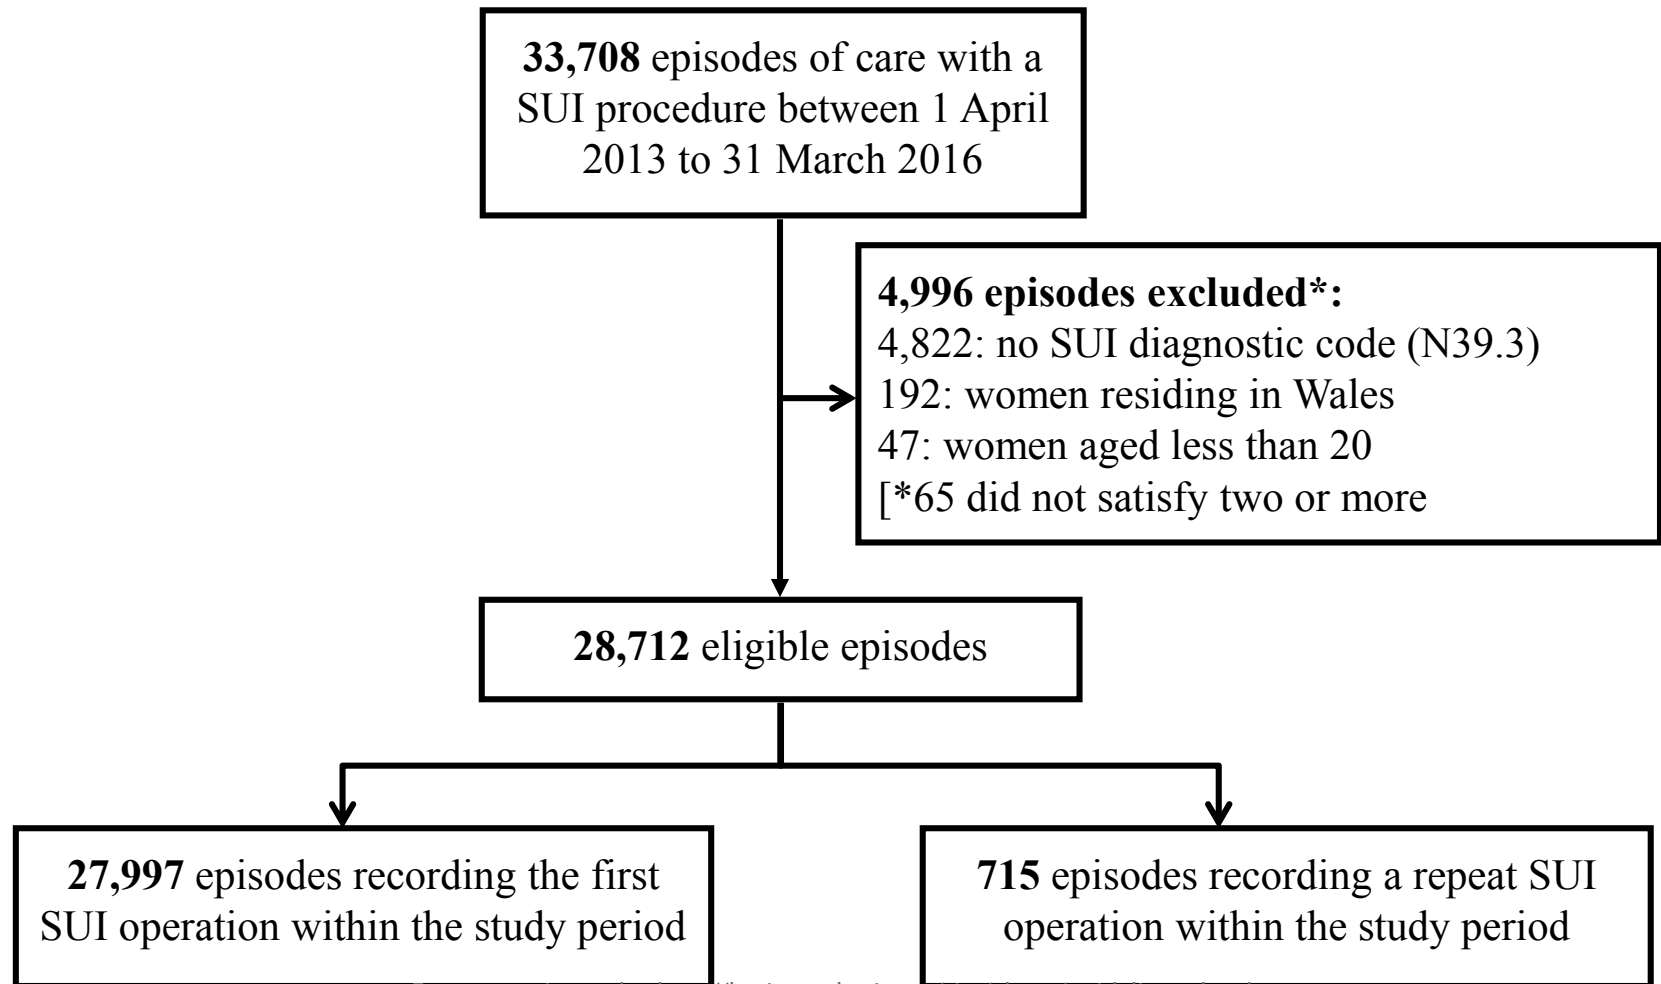

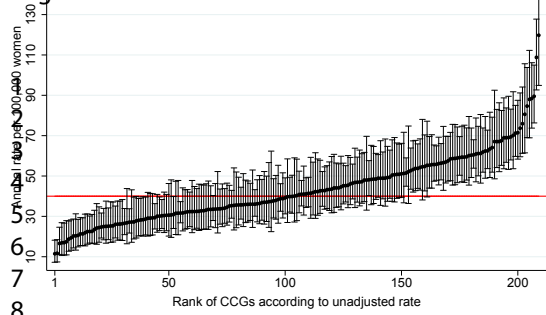

National rate: 40 per 100,000 women per year; range: 11-120  
47% outliers: 56 above and 43 below

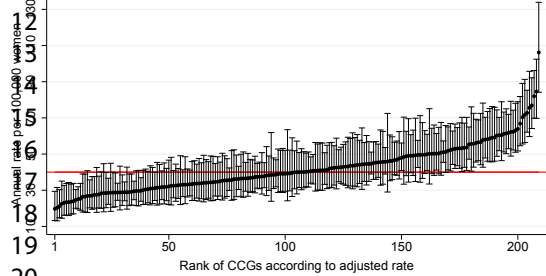

National rate: 40 per 100,000 women per year; range: 20-106  
36% outliers: 45 above and 50 below

— English average — 99.8% credibility interval  
• CCG rate

Source: 2013-2016 HES extracts of admissions records for stress UI

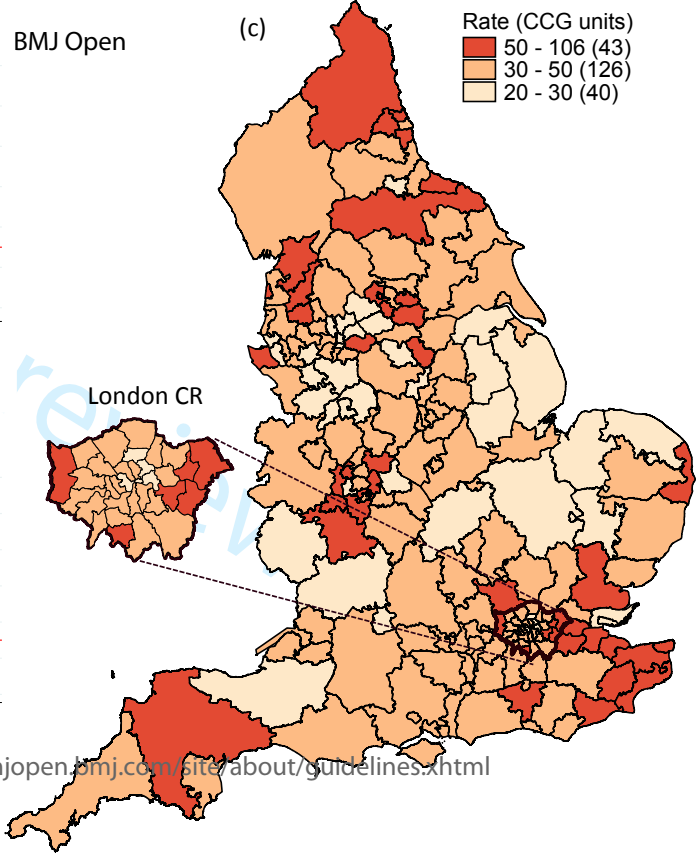

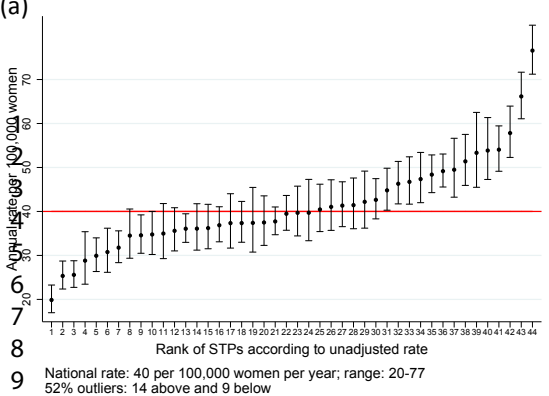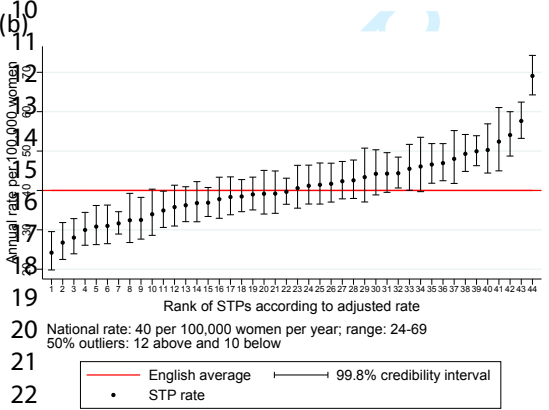

Source: 2013-2016 HES extracts of admissions records for stress UI

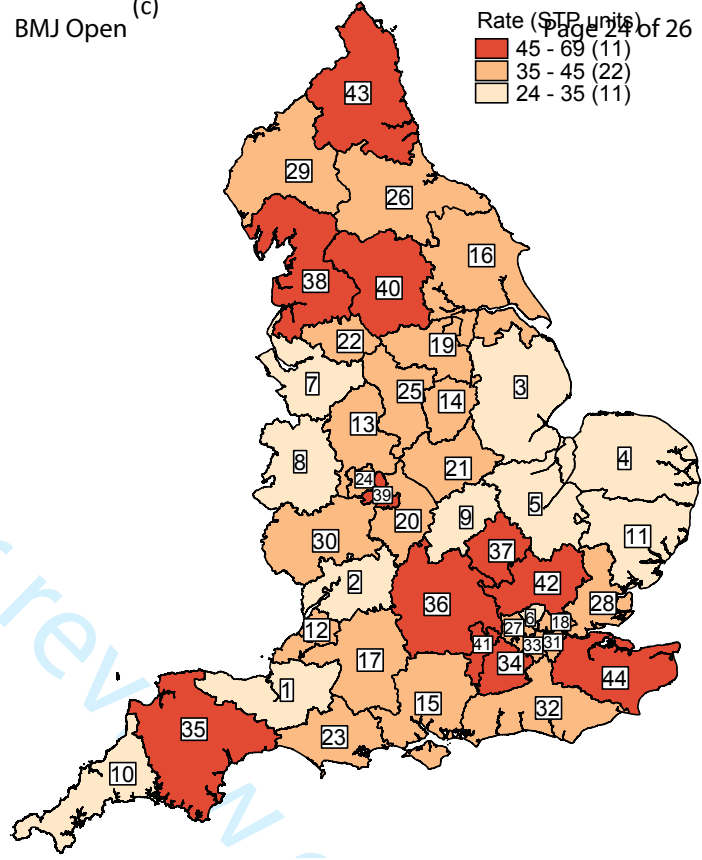

- |                                                      |                                                                      |                                                    |
|------------------------------------------------------|----------------------------------------------------------------------|----------------------------------------------------|
| 1.Somerset                                           | 16.Coast, Humber and Vale                                            | 30.Herefordshire and Worcestershire                |
| 2.Gloucestershire                                    | 17.Bath, Swindon and Wiltshire                                       | 31.South East London                               |
| 3.Lincolnshire                                       | 18.North East London                                                 | 32.Sussex and East Surrey                          |
| 4.Norfolk and Waveney                                | 19.South Yorkshire and Bassetlaw                                     | 33.South West London                               |
| 5.Northamptonshire                                   | 20.Coventry and Warwickshire                                         | 34.Surrey Heartlands                               |
| 6.North Central London                               | 21.Leicester, Leicestershire and Rutland                             | 35.Devon                                           |
| 7.Cheshire and Merseyside                            | 22.Greater Manchester                                                | 36.Buckinghamshire, Oxfordshire and Berkshire West |
| 8.Shropshire and Telford and Wrekin                  | 23.Dorset                                                            | 37.Milton Keynes, Bedfordshire and Luton           |
| 9.Northamptonshire                                   | 24.The Black Country                                                 | 38.Lancashire and South Cumbria                    |
| 10.Cornwall and the Isles of Scilly                  | 25.Derbyshire                                                        | 39.Birmingham and Solihull                         |
| 11.Fulford and North East Essex                      | 26.Durham, Darlington, Teesside, Hambleton, Richmondshire and Whitby | 40.West Yorkshire                                  |
| 12.Bristol, North Somerset and South Gloucestershire | 27.North West London                                                 | 41.Frimley Health                                  |
| 13.Staffordshire                                     | 28.Mid and South Essex                                               | 42.Hertfordshire and West Essex                    |
| 14.N Nottinghamshire                                 | 29.West, North and East Cumbria                                      | 43.Northumberland, Tyne and Wear and North Durham  |
| 15.Hampshire and the Isle of Wight                   |                                                                      | 44.Kent and Medway                                 |

STROBE Statement—Checklist of items that should be included in reports of *cohort studies*

|                              | Item No | Recommendation                                                                                                                                                                                    | Page Number    |
|------------------------------|---------|---------------------------------------------------------------------------------------------------------------------------------------------------------------------------------------------------|----------------|
| <b>Title and abstract</b>    | 1       | (a) Indicate the study's design with a commonly used term in the title or the abstract                                                                                                            | 1              |
|                              |         | (b) Provide in the abstract an informative and balanced summary of what was done and what was found                                                                                               | 2              |
| <b>Introduction</b>          |         |                                                                                                                                                                                                   |                |
| Background/rationale         | 2       | Explain the scientific background and rationale for the investigation being reported                                                                                                              | 4              |
| Objectives                   | 3       | State specific objectives, including any prespecified hypotheses                                                                                                                                  | 4              |
| <b>Methods</b>               |         |                                                                                                                                                                                                   |                |
| Study design                 | 4       | Present key elements of study design early in the paper                                                                                                                                           | 5              |
| Setting                      | 5       | Describe the setting, locations, and relevant dates, including periods of recruitment, exposure, follow-up, and data collection                                                                   | 5              |
| Participants                 | 6       | (a) Give the eligibility criteria, and the sources and methods of selection of participants. Describe methods of follow-up                                                                        | 5              |
|                              |         | (b) For matched studies, give matching criteria and number of exposed and unexposed                                                                                                               | 5              |
| Variables                    | 7       | Clearly define all outcomes, exposures, predictors, potential confounders, and effect modifiers. Give diagnostic criteria, if applicable                                                          | 5              |
| Data sources/<br>measurement | 8*      | For each variable of interest, give sources of data and details of methods of assessment (measurement). Describe comparability of assessment methods if there is more than one group              | 5              |
| Bias                         | 9       | Describe any efforts to address potential sources of bias                                                                                                                                         |                |
| Study size                   | 10      | Explain how the study size was arrived at                                                                                                                                                         | 5              |
| Quantitative variables       | 11      | Explain how quantitative variables were handled in the analyses. If applicable, describe which groupings were chosen and why                                                                      | 5-6            |
| Statistical methods          | 12      | (a) Describe all statistical methods, including those used to control for confounding                                                                                                             | 6              |
|                              |         | (b) Describe any methods used to examine subgroups and interactions                                                                                                                               | 6              |
|                              |         | (c) Explain how missing data were addressed                                                                                                                                                       | 6              |
|                              |         | (d) If applicable, explain how loss to follow-up was addressed                                                                                                                                    |                |
|                              |         | (e) Describe any sensitivity analyses                                                                                                                                                             |                |
| <b>Results</b>               |         |                                                                                                                                                                                                   |                |
| Participants                 | 13*     | (a) Report numbers of individuals at each stage of study—eg numbers potentially eligible, examined for eligibility, confirmed eligible, included in the study, completing follow-up, and analysed | 7 and Figure 1 |
|                              |         | (b) Give reasons for non-participation at each stage                                                                                                                                              | Figure 1       |
|                              |         | (c) Consider use of a flow diagram                                                                                                                                                                | Figure 1       |
| Descriptive data             | 14*     | (a) Give characteristics of study participants (eg demographic, clinical, social) and information on exposures and potential confounders                                                          | Table 2        |
|                              |         | (b) Indicate number of participants with missing data for each variable of interest                                                                                                               | Figure 1       |
|                              |         | (c) Summarise follow-up time (eg, average and total amount)                                                                                                                                       |                |

|                          |     |                                                                                                                                                                                                                                                                                                                                                                                                               |               |
|--------------------------|-----|---------------------------------------------------------------------------------------------------------------------------------------------------------------------------------------------------------------------------------------------------------------------------------------------------------------------------------------------------------------------------------------------------------------|---------------|
| Outcome data             | 15* | Report numbers of outcome events or summary measures over time                                                                                                                                                                                                                                                                                                                                                | 7 and Table 2 |
| Main results             | 16  | (a) Give unadjusted estimates and, if applicable, confounder-adjusted estimates and their precision (eg, 95% confidence interval). Make clear which confounders were adjusted for and why they were included<br>(b) Report category boundaries when continuous variables were categorized<br>(c) If relevant, consider translating estimates of relative risk into absolute risk for a meaningful time period | Table 2       |
| Other analyses           | 17  | Report other analyses done—eg analyses of subgroups and interactions, and sensitivity analyses                                                                                                                                                                                                                                                                                                                |               |
| <b>Discussion</b>        |     |                                                                                                                                                                                                                                                                                                                                                                                                               |               |
| Key results              | 18  | Summarise key results with reference to study objectives                                                                                                                                                                                                                                                                                                                                                      | 12            |
| Limitations              | 19  | Discuss limitations of the study, taking into account sources of potential bias or imprecision. Discuss both direction and magnitude of any potential bias                                                                                                                                                                                                                                                    | 14-15         |
| Interpretation           | 20  | Give a cautious overall interpretation of results considering objectives, limitations, multiplicity of analyses, results from similar studies, and other relevant evidence                                                                                                                                                                                                                                    | 12-13         |
| Generalisability         | 21  | Discuss the generalisability (external validity) of the study results                                                                                                                                                                                                                                                                                                                                         | 12            |
| <b>Other information</b> |     |                                                                                                                                                                                                                                                                                                                                                                                                               |               |
| Funding                  | 22  | Give the source of funding and the role of the funders for the present study and, if applicable, for the original study on which the present article is based                                                                                                                                                                                                                                                 | 17            |

\*Give information separately for exposed and unexposed groups.

**Note:** An Explanation and Elaboration article discusses each checklist item and gives methodological background and published examples of transparent reporting. The STROBE checklist is best used in conjunction with this article (freely available on the Web sites of PLoS Medicine at <http://www.plosmedicine.org/>, Annals of Internal Medicine at <http://www.annals.org/>, and Epidemiology at <http://www.epidem.com/>). Information on the STROBE Initiative is available at <http://www.strobe-statement.org>.
